# Supplementary material for: Construction and Validation of a Ferroptosis-Related Prognostic Model for Endometrial Cancer
Source: Front Genet. 2021 Sep 28;12:729046. doi: 10.3389/fgene.2021.729046 (PMC8505971; doi:10.3389/fgene.2021.729046)
Supplement: Supplementary file 2 [file Table_2.XLSX]

## Sheet: S4
Table-S2 Clinical information and classification information of 544 tumor samples
sample	censor	patient	os	age	type	project	stage	grade	diabetes	hypertension	menopause	pregnancies	primary_therapy_outcome_success	radiation_therapy	bmi	cluster	Age	BMI	PTEN	TP53	KRAS	APC	Status	gene.cluster	Fe.score	Fe.scoreGroup
TCGA-AX-A06J-01A	0	TCGA-AX-A06J	913	71	Tumor	TCGA-UCEC	Stage I	G3			Post	3	Complete Remission/Response	YES	45.9087	Fe.cluster A	>64	>=24	Mutant	Wildtype	Wildtype	Wildtype	Alive	Fe.Gene.cluster A	-4.90254	Low Fe.score
TCGA-B5-A11P-01B	0	TCGA-B5-A11P	825	87	Tumor	TCGA-UCEC	Stage I	G3	NO	YES	Post	4+		NO	NA	Fe.cluster B	>64		Mutant	Wildtype	Wildtype	Wildtype	Alive	Fe.Gene.cluster B	2.30386	High Fe.score
TCGA-AX-A05T-01A	0	TCGA-AX-A05T	1010	82	Tumor	TCGA-UCEC	Stage I	G1			Post			NO	23.533	Fe.cluster B	>64	normal	Wildtype	Wildtype	Wildtype	Wildtype	Alive	Fe.Gene.cluster B	-0.10605	High Fe.score
TCGA-BG-A0M8-01A	0	TCGA-BG-A0M8	2020	50	Tumor	TCGA-UCEC	Stage I	G3			Indeterminate		Complete Remission/Response	NO	81.6406	Fe.cluster C	<=64	>=24	Wildtype	Mutant	Mutant	Wildtype	Alive	Fe.Gene.cluster C	-8.04606	Low Fe.score
TCGA-BG-A0LX-01A	0	TCGA-BG-A0LX	614	57	Tumor	TCGA-UCEC	Stage I	G2	NO	NO	Post	0	Complete Remission/Response	YES	33.218	Fe.cluster C	<=64	>=24	Mutant	Wildtype	Wildtype	Wildtype	Alive	Fe.Gene.cluster B	-5.44475	Low Fe.score
TCGA-EY-A5W2-01A	0	TCGA-EY-A5W2	516	72	Tumor	TCGA-UCEC	Stage I	G3			Post		Complete Remission/Response	YES	32.0204	Fe.cluster C	>64	>=24	Mutant	Wildtype	Mutant	Wildtype	Alive	Fe.Gene.cluster C	-1.68893	High Fe.score
TCGA-D1-A2G0-01A	0	TCGA-D1-A2G0	1484	70	Tumor	TCGA-UCEC	Stage I	G3	NO	NO	Post	2			24.965	Fe.cluster C	>64	>=24	Mutant	Wildtype	Mutant	Wildtype	Alive	Fe.Gene.cluster C	0.482563	High Fe.score
TCGA-A5-A0G1-01A	1	TCGA-A5-A0G1	3251	67	Tumor	TCGA-UCEC	Stage I	G3	NO	NO	Post	3	Complete Remission/Response	YES	20.9042	Fe.cluster A	>64	normal	Mutant	Mutant	Wildtype	Mutant	Dead	Fe.Gene.cluster C	-12.7193	Low Fe.score
TCGA-EO-A3KW-01A	0	TCGA-EO-A3KW	497	72	Tumor	TCGA-UCEC	Stage I	G3	NO	NO	Post	2	Complete Remission/Response	YES	26.4855	Fe.cluster C	>64	>=24	Wildtype	Wildtype	Wildtype	Wildtype	Alive	Fe.Gene.cluster C	2.11576	High Fe.score
TCGA-BG-A0MI-01A	1	TCGA-BG-A0MI	714	83	Tumor	TCGA-UCEC	Stage I	G2	NO	YES	Post	3		NO	37.0983	Fe.cluster C	>64	>=24	Mutant	Wildtype	Wildtype	Wildtype	Dead	Fe.Gene.cluster B	-4.71776	Low Fe.score
TCGA-AJ-A3NG-01A	0	TCGA-AJ-A3NG	475	83	Tumor	TCGA-UCEC	Stage II	G3	NO	YES	Post	3	Complete Remission/Response	YES	38.7097	Fe.cluster B	>64	>=24	Mutant	Wildtype	Wildtype	Wildtype	Alive	Fe.Gene.cluster C	0.000573	High Fe.score
TCGA-AJ-A3OJ-01A	0	TCGA-AJ-A3OJ	467	54	Tumor	TCGA-UCEC	Stage II	G3	NO	YES	Indeterminate	2	Complete Remission/Response	YES	42.1924	Fe.cluster A	<=64	>=24	Mutant	Mutant	Wildtype	Wildtype	Alive	Fe.Gene.cluster C	-4.3147	Low Fe.score
TCGA-A5-A2K5-01A	0	TCGA-A5-A2K5	752	76	Tumor	TCGA-UCEC	Stage I	G3	YES	YES	Post	1	Complete Remission/Response	YES	47.8001	Fe.cluster C	>64	>=24	Mutant	Wildtype	Mutant	Mutant	Alive	Fe.Gene.cluster B	-6.21853	Low Fe.score
TCGA-AX-A1C7-01A	0	TCGA-AX-A1C7	1054	77	Tumor	TCGA-UCEC	Stage I	G3			Post			NO	25.9695	Fe.cluster C	>64	>=24	Wildtype	Wildtype	Wildtype	Wildtype	Alive	Fe.Gene.cluster C	3.7285	High Fe.score
TCGA-D1-A167-01A	0	TCGA-D1-A167	478	70	Tumor	TCGA-UCEC	Stage I	G2	NO	YES	Post	2	Complete Remission/Response	YES	31.1634	Fe.cluster B	>64	>=24	Wildtype	Wildtype	Wildtype	Mutant	Alive	Fe.Gene.cluster C	-0.42036	High Fe.score
TCGA-B5-A11X-01A	0	TCGA-B5-A11X	596	66	Tumor	TCGA-UCEC	Stage III	G3		YES	Post	2		NO	27.7344	Fe.cluster C	>64	>=24	Mutant	Wildtype	Wildtype	Wildtype	Alive	Fe.Gene.cluster C	-5.72313	Low Fe.score
TCGA-BS-A0V4-01A	0	TCGA-BS-A0V4	1810	56	Tumor	TCGA-UCEC	Stage I	G1	NO	YES	Post	3	Complete Remission/Response	NO	35.2617	Fe.cluster A	<=64	>=24	Wildtype	Wildtype	Mutant	Wildtype	Alive	Fe.Gene.cluster B	-6.06336	Low Fe.score
TCGA-DF-A2L0-01A	1	TCGA-DF-A2L0	788	60	Tumor	TCGA-UCEC	Stage III	G3	NO	NO	Post	3	Complete Remission/Response	YES	33.6593	Fe.cluster C	<=64	>=24	Mutant	Mutant	Wildtype	Wildtype	Dead	Fe.Gene.cluster C	0.865392	High Fe.score
TCGA-BK-A6W3-01A	0	TCGA-BK-A6W3	305	34	Tumor	TCGA-UCEC	Stage II	G2	NO	NO	Pre	3	Complete Remission/Response	NO	31.9122	Fe.cluster A	<=64	>=24	Mutant	Wildtype	Wildtype	Mutant	Alive	Fe.Gene.cluster B	-7.16711	Low Fe.score
TCGA-FI-A2EU-01A	0	TCGA-FI-A2EU	2941	68	Tumor	TCGA-UCEC	Stage I	G3	YES	YES	Post	2	Complete Remission/Response	NO	32.9507	Fe.cluster B	>64	>=24	Wildtype	Wildtype	Wildtype	Wildtype	Alive	Fe.Gene.cluster C	2.99068	High Fe.score
TCGA-AX-A3FS-01A	0	TCGA-AX-A3FS	7	82	Tumor	TCGA-UCEC	Stage I	G3			Post				50.722	Fe.cluster B	>64	>=24	Mutant	Wildtype	Wildtype	Wildtype	Alive	Fe.Gene.cluster C	-1.20724	High Fe.score
TCGA-D1-A17R-01A	1	TCGA-D1-A17R	339	58	Tumor	TCGA-UCEC	Stage I	G2	NO	YES	Pre	2	Complete Remission/Response	NO	46.281	Fe.cluster A	<=64	>=24	Mutant	Wildtype	Wildtype	Wildtype	Dead	Fe.Gene.cluster B	-4.02779	Low Fe.score
TCGA-AJ-A5DW-01A	0	TCGA-AJ-A5DW	390	56	Tumor	TCGA-UCEC	Stage I	G2	NO	YES	Post	3	Complete Remission/Response	NO	39.0835	Fe.cluster B	<=64	>=24	Mutant	Wildtype	Wildtype	Mutant	Alive	Fe.Gene.cluster B	-3.22559	High Fe.score
TCGA-EY-A1GH-01A	0	TCGA-EY-A1GH	710	70	Tumor	TCGA-UCEC	Stage I	G2	NO	YES	Post	2	Complete Remission/Response	YES	40.4844	Fe.cluster B	>64	>=24	Mutant	Wildtype	Wildtype	Wildtype	Alive	Fe.Gene.cluster A	-3.9906	Low Fe.score
TCGA-AP-A1DM-01A	0	TCGA-AP-A1DM	1700	60	Tumor	TCGA-UCEC	Stage I	G1	NO	YES	Post	0	Complete Remission/Response	YES	36.391	Fe.cluster C	<=64	>=24	Mutant	Wildtype	Mutant	Wildtype	Alive	Fe.Gene.cluster C	-3.05802	High Fe.score
TCGA-BG-A0MS-01A	0	TCGA-BG-A0MS	1882	53	Tumor	TCGA-UCEC	Stage III	G3			Post		Complete Remission/Response	YES	25.3906	Fe.cluster A	<=64	>=24	Mutant	Wildtype	Wildtype	Wildtype	Alive	Fe.Gene.cluster B	-5.29079	Low Fe.score
TCGA-E6-A1LZ-01A	0	TCGA-E6-A1LZ	2406	76	Tumor	TCGA-UCEC	Stage I	G3	NO	NO	Post	4+	Complete Remission/Response	YES	NA	Fe.cluster D	>64		Wildtype	Mutant	Wildtype	Wildtype	Alive	Fe.Gene.cluster C	-0.55809	High Fe.score
TCGA-B5-A11E-01A	0	TCGA-B5-A11E	1820	53	Tumor	TCGA-UCEC	Stage I	G3		NO	Peri	2	Complete Remission/Response	NO	19.1001	Fe.cluster B	<=64	normal	Mutant	Mutant	Mutant	Mutant	Alive	Fe.Gene.cluster C	-2.73963	High Fe.score
TCGA-FI-A2F9-01A	0	TCGA-FI-A2F9	1803	79	Tumor	TCGA-UCEC	Stage I	G3			Post		Complete Remission/Response	NO	32.3265	Fe.cluster C	>64	>=24	Wildtype	Wildtype	Wildtype	Wildtype	Alive	Fe.Gene.cluster C	4.11972	High Fe.score
TCGA-BG-A0YV-01A	0	TCGA-BG-A0YV	382	67	Tumor	TCGA-UCEC	Stage III	G3	NO	YES	Post		Complete Remission/Response	YES	22.4766	Fe.cluster A	>64	normal	Mutant	Mutant	Wildtype	Wildtype	Alive	Fe.Gene.cluster C	-0.25763	High Fe.score
TCGA-AP-A1DR-01A	0	TCGA-AP-A1DR	1495	59	Tumor	TCGA-UCEC	Stage III	G2	YES	YES	Post	2	Complete Remission/Response	YES	42.5781	Fe.cluster C	<=64	>=24	Mutant	Wildtype	Mutant	Mutant	Alive	Fe.Gene.cluster C	-0.86383	High Fe.score
TCGA-AP-A0LG-01A	0	TCGA-AP-A0LG	2015	54	Tumor	TCGA-UCEC	Stage I	G3			Post			YES	28.6048	Fe.cluster B	<=64	>=24	Mutant	Wildtype	Mutant	Mutant	Alive	Fe.Gene.cluster B	-2.02088	High Fe.score
TCGA-BG-A186-01A	0	TCGA-BG-A186	419	61	Tumor	TCGA-UCEC	Stage III	G2	NO	NO		2	Complete Remission/Response	YES	28.578	Fe.cluster B	<=64	>=24	Wildtype	Wildtype	Wildtype	Wildtype	Alive	Fe.Gene.cluster B	-5.70297	Low Fe.score
TCGA-AX-A1CK-01A	0	TCGA-AX-A1CK	2441	58	Tumor	TCGA-UCEC	Stage I	G2			Post			NO	27.0993	Fe.cluster B	<=64	>=24	Wildtype	Wildtype	Wildtype	Wildtype	Alive	Fe.Gene.cluster B	-4.16635	Low Fe.score
TCGA-AX-A2HC-01A	0	TCGA-AX-A2HC	1044	53	Tumor	TCGA-UCEC	Stage III	G3		YES		2	Complete Remission/Response	NO	47.2681	Fe.cluster D	<=64	>=24	Mutant	Mutant	Mutant	Mutant	Alive	Fe.Gene.cluster C	-0.27192	High Fe.score
TCGA-BG-A18C-01A	0	TCGA-BG-A18C	470	72	Tumor	TCGA-UCEC	Stage I	G2	YES	YES		2	Complete Remission/Response	NO	36.1323	Fe.cluster A	>64	>=24	Wildtype	Mutant	Wildtype	Wildtype	Alive	Fe.Gene.cluster C	-3.01286	High Fe.score
TCGA-EY-A2OQ-01A	0	TCGA-EY-A2OQ	885	61	Tumor	TCGA-UCEC	Stage I	G3	NO	YES	Post	3	Complete Remission/Response	NO	32.8824	Fe.cluster B	<=64	>=24	Wildtype	Wildtype	Wildtype	Wildtype	Alive	Fe.Gene.cluster C	2.13191	High Fe.score
TCGA-DF-A2KR-01A	0	TCGA-DF-A2KR	1865	84	Tumor	TCGA-UCEC	Stage III	G3	NO	YES	Post	0	Complete Remission/Response	YES	NA	Fe.cluster C	>64		Wildtype	Mutant	Mutant	Wildtype	Alive	Fe.Gene.cluster C	-0.76516	High Fe.score
TCGA-FI-A3PV-01A	1	TCGA-FI-A3PV	1249	68	Tumor	TCGA-UCEC	Stage I	High Grade			Post				34.6809	Fe.cluster B	>64	>=24	Wildtype	Mutant	Wildtype	Wildtype	Dead	Fe.Gene.cluster C	0.664137	High Fe.score
TCGA-BK-A0CA-01B	0	TCGA-BK-A0CA	1064	61	Tumor	TCGA-UCEC	Stage III	G3			Post			NO	NA	Fe.cluster B	<=64						Alive	Fe.Gene.cluster A	-1.88939	High Fe.score
TCGA-AJ-A23M-01A	1	TCGA-AJ-A23M	616	61	Tumor	TCGA-UCEC	Stage II	G3	YES	YES	Post	1	Stable Disease	YES	61.0284	Fe.cluster C	<=64	>=24	Wildtype	Mutant	Wildtype	Wildtype	Dead	Fe.Gene.cluster C	1.92069	High Fe.score
TCGA-A5-A0R7-01A	0	TCGA-A5-A0R7	535	55	Tumor	TCGA-UCEC	Stage I	G2	NO	NO	Post	0	Complete Remission/Response	NO	49.9541	Fe.cluster C	<=64	>=24	Mutant	Mutant	Wildtype	Wildtype	Alive	Fe.Gene.cluster C	-4.17194	Low Fe.score
TCGA-BG-A0W2-01A	0	TCGA-BG-A0W2	1721	57	Tumor	TCGA-UCEC	Stage I	G1			Post		Complete Remission/Response	NO	44.4444	Fe.cluster B	<=64	>=24	Mutant	Wildtype	Wildtype	Wildtype	Alive	Fe.Gene.cluster B	-6.40888	Low Fe.score
TCGA-PG-A5BC-01A	0	TCGA-PG-A5BC	707	72	Tumor	TCGA-UCEC	Stage II	G3	YES	YES	Post	4+	Complete Remission/Response	NO	32.7449	Fe.cluster B	>64	>=24	Wildtype	Mutant	Wildtype	Wildtype	Alive	Fe.Gene.cluster C	2.74675	High Fe.score
TCGA-5B-A90C-01A	0	TCGA-5B-A90C	1202	69	Tumor	TCGA-UCEC	Stage I	G2		YES	Post	2		YES	39.2565	Fe.cluster B	>64	>=24	Wildtype	Mutant	Wildtype	Wildtype	Alive	Fe.Gene.cluster C	-0.06762	High Fe.score
TCGA-A5-A0GU-01A	0	TCGA-A5-A0GU	860	58	Tumor	TCGA-UCEC	Stage I	G1	NO	YES	Post	2	Complete Remission/Response	NO	37.1094	Fe.cluster B	<=64	>=24	Mutant	Wildtype	Wildtype	Wildtype	Alive	Fe.Gene.cluster B	-6.09706	Low Fe.score
TCGA-A5-A1OF-01A	0	TCGA-A5-A1OF	973	47	Tumor	TCGA-UCEC	Stage I	High Grade	NO	NO	Post	4+	Complete Remission/Response	YES	29.1363	Fe.cluster D	<=64	>=24	Mutant	Mutant	Mutant	Mutant	Alive	Fe.Gene.cluster C	-5.743	Low Fe.score
TCGA-AX-A1CE-01A	0	TCGA-AX-A1CE	1037	60	Tumor	TCGA-UCEC	Stage I	G3			Post			YES	22.6562	Fe.cluster C	<=64	normal	Mutant	Wildtype	Mutant	Mutant	Alive	Fe.Gene.cluster C	-2.9402	High Fe.score
TCGA-EY-A215-01A	0	TCGA-EY-A215	574	60	Tumor	TCGA-UCEC	Stage I	G3	NO	NO	Post	2	Complete Remission/Response	YES	17.3611	Fe.cluster A	<=64	<18	Mutant	Wildtype	Wildtype	Mutant	Alive	Fe.Gene.cluster C	-6.33043	Low Fe.score
TCGA-EY-A1GT-01A	0	TCGA-EY-A1GT	490	68	Tumor	TCGA-UCEC	Stage III	G1	NO	YES	Post	1	Complete Remission/Response	NO	24.8016	Fe.cluster A	>64	>=24	Wildtype	Wildtype	Mutant	Wildtype	Alive	Fe.Gene.cluster C	-0.69833	High Fe.score
TCGA-AP-A0LI-01A	0	TCGA-AP-A0LI	2972	67	Tumor	TCGA-UCEC	Stage III	G3			Post			NO	33.1777	Fe.cluster C	>64	>=24	Wildtype	Wildtype	Wildtype	Wildtype	Alive	Fe.Gene.cluster C	-5.90284	Low Fe.score
TCGA-B5-A1MW-01A	0	TCGA-B5-A1MW	447	55	Tumor	TCGA-UCEC	Stage I	G3		NO	Post	1	Complete Remission/Response	YES	23.3355	Fe.cluster B	<=64	normal	Mutant	Wildtype	Wildtype	Wildtype	Alive	Fe.Gene.cluster C	4.03727	High Fe.score
TCGA-AX-A0IW-01A	0	TCGA-AX-A0IW	1149	67	Tumor	TCGA-UCEC	Stage III	G3			Post	3	Complete Remission/Response	NO	22.9591	Fe.cluster C	>64	normal	Wildtype	Mutant	Wildtype	Wildtype	Alive	Fe.Gene.cluster C	2.48347	High Fe.score
TCGA-EY-A2ON-01A	1	TCGA-EY-A2ON	610	61	Tumor	TCGA-UCEC	Stage IV	G3	NO	YES	Post	3	Progressive Disease	NO	36.7309	Fe.cluster C	<=64	>=24	Wildtype	Mutant	Wildtype	Wildtype	Dead	Fe.Gene.cluster C	-1.28412	High Fe.score
TCGA-B5-A11G-01A	0	TCGA-B5-A11G	3448	71	Tumor	TCGA-UCEC	Stage I	G1	NO	YES	Post	2	Complete Remission/Response	NO	30.0781	Fe.cluster A	>64	>=24	Mutant	Wildtype	Wildtype	Mutant	Alive	Fe.Gene.cluster A	-6.96418	Low Fe.score
TCGA-QS-A5YR-01A	0	TCGA-QS-A5YR	719	61	Tumor	TCGA-UCEC	Stage III	G2	YES	YES	Post	4+	Stable Disease	NO	35.4308	Fe.cluster D	<=64	>=24	Mutant	Wildtype	Wildtype	Wildtype	Alive	Fe.Gene.cluster A	-7.32032	Low Fe.score
TCGA-BS-A0U5-01A	0	TCGA-BS-A0U5	2935	76	Tumor	TCGA-UCEC	Stage I	G1	NO	NO	Post		Complete Remission/Response	NO	21.6713	Fe.cluster B	>64	normal	Mutant	Wildtype	Wildtype	Wildtype	Alive	Fe.Gene.cluster B	-0.72406	High Fe.score
TCGA-SL-A6J9-01A	0	TCGA-SL-A6J9	2	73	Tumor	TCGA-UCEC	Stage I	G3			Post				31.5537	Fe.cluster A	>64	>=24	Wildtype	Mutant	Wildtype	Wildtype	Alive	Fe.Gene.cluster C	-2.11666	High Fe.score
TCGA-EO-A1Y7-01A	0	TCGA-EO-A1Y7	1495	65	Tumor	TCGA-UCEC	Stage I	G3			Post		Stable Disease	YES	34.8944	Fe.cluster C	>64	>=24	Mutant	Wildtype	Wildtype	Wildtype	Alive	Fe.Gene.cluster C	-0.77981	High Fe.score
TCGA-BS-A0UJ-01A	0	TCGA-BS-A0UJ	2506	68	Tumor	TCGA-UCEC	Stage I	G1	YES	YES	Post	4+	Complete Remission/Response	NO	21.6441	Fe.cluster A	>64	normal	Wildtype	Wildtype	Wildtype	Mutant	Alive	Fe.Gene.cluster B	-7.32815	Low Fe.score
TCGA-AX-A1C8-01A	0	TCGA-AX-A1C8	776	77	Tumor	TCGA-UCEC	Stage III	G3			Post			NO	27.1203	Fe.cluster C	>64	>=24	Wildtype	Mutant	Wildtype	Wildtype	Alive	Fe.Gene.cluster C	0.780804	High Fe.score
TCGA-DF-A2KY-01A	0	TCGA-DF-A2KY	332	49	Tumor	TCGA-UCEC	Stage IV	G3			Pre				NA	Fe.cluster A	<=64						Alive	Fe.Gene.cluster C	-4.84014	Low Fe.score
TCGA-B5-A11L-01B	1	TCGA-B5-A11L	2240	71	Tumor	TCGA-UCEC	Stage I	G2			Post		Complete Remission/Response	YES	34.6268	Fe.cluster A	>64	>=24	Mutant	Wildtype	Mutant	Wildtype	Dead	Fe.Gene.cluster B	-5.72991	Low Fe.score
TCGA-EO-A1Y8-01A	0	TCGA-EO-A1Y8	901	87	Tumor	TCGA-UCEC	Stage I	G3	NO	YES	Post	1	Complete Remission/Response	NO	27.2096	Fe.cluster C	>64	>=24	Wildtype	Mutant	Wildtype	Wildtype	Alive	Fe.Gene.cluster C	3.48377	High Fe.score
TCGA-FI-A2F4-01A	0	TCGA-FI-A2F4	2230	64	Tumor	TCGA-UCEC	Stage I	G3			Post		Complete Remission/Response	NO	27.1809	Fe.cluster B	<=64	>=24	Mutant	Wildtype	Wildtype	Mutant	Alive	Fe.Gene.cluster B	-7.1641	Low Fe.score
TCGA-AJ-A2QL-01A	0	TCGA-AJ-A2QL	602	60	Tumor	TCGA-UCEC	Stage III	G3	YES	YES	Post		Complete Remission/Response	NO	42.1544	Fe.cluster B	<=64	>=24	Mutant	Wildtype	Wildtype	Wildtype	Alive	Fe.Gene.cluster A	-4.85114	Low Fe.score
TCGA-BS-A0VI-01A	0	TCGA-BS-A0VI	2646	58	Tumor	TCGA-UCEC	Stage II	G3	NO	NO	Post	1	Complete Remission/Response	NO	34.2504	Fe.cluster C	<=64	>=24	Mutant	Wildtype	Wildtype	Wildtype	Alive	Fe.Gene.cluster B	-2.83174	High Fe.score
TCGA-AP-A0LF-01A	0	TCGA-AP-A0LF	2845	82	Tumor	TCGA-UCEC	Stage IV	G3			Post			NO	27.7767	Fe.cluster C	>64	>=24	Wildtype	Mutant	Wildtype	Wildtype	Alive	Fe.Gene.cluster C	-7.21404	Low Fe.score
TCGA-EY-A549-01A	0	TCGA-EY-A549	605	78	Tumor	TCGA-UCEC	Stage I	G3			Post		Complete Remission/Response	YES	27.1809	Fe.cluster A	>64	>=24	Mutant	Wildtype	Wildtype	Wildtype	Alive	Fe.Gene.cluster A	-4.51967	Low Fe.score
TCGA-B5-A11U-01A	0	TCGA-B5-A11U	509	74	Tumor	TCGA-UCEC	Stage IV	G3	YES	YES	Post	2	Complete Remission/Response	YES	26.4023	Fe.cluster B	>64	>=24	Mutant	Wildtype	Wildtype	Wildtype	Alive	Fe.Gene.cluster C	-0.66884	High Fe.score
TCGA-B5-A11W-01A	0	TCGA-B5-A11W	593	61	Tumor	TCGA-UCEC	Stage I	G2	YES	YES	Post	1	Complete Remission/Response	YES	38.3906	Fe.cluster B	<=64	>=24	Mutant	Wildtype	Mutant	Wildtype	Alive	Fe.Gene.cluster A	-6.05833	Low Fe.score
TCGA-B5-A0JS-01A	0	TCGA-B5-A0JS	2627	54	Tumor	TCGA-UCEC	Stage I	G1	NO	YES	Post	2	Complete Remission/Response	NO	38.0623	Fe.cluster B	<=64	>=24	Wildtype	Wildtype	Mutant	Wildtype	Alive	Fe.Gene.cluster A	-8.52027	Low Fe.score
TCGA-AX-A06B-01A	0	TCGA-AX-A06B	2058	72	Tumor	TCGA-UCEC	Stage II	G3			Post			NO	40.7877	Fe.cluster C	>64	>=24	Wildtype	Wildtype	Wildtype	Wildtype	Alive	Fe.Gene.cluster C	-1.24658	High Fe.score
TCGA-B5-A0JY-01A	0	TCGA-B5-A0JY	2107	50	Tumor	TCGA-UCEC	Stage III	G3	NO	NO	Post	2	Complete Remission/Response	NO	23.7387	Fe.cluster C	<=64	normal	Mutant	Wildtype	Wildtype	Mutant	Alive	Fe.Gene.cluster C	-3.93759	Low Fe.score
TCGA-D1-A3JP-01A	0	TCGA-D1-A3JP	515	61	Tumor	TCGA-UCEC	Stage I	G3			Post				23.3377	Fe.cluster D	<=64	normal	Wildtype	Mutant	Wildtype	Wildtype	Alive	Fe.Gene.cluster C	-7.82151	Low Fe.score
TCGA-D1-A16V-01A	1	TCGA-D1-A16V	120	78	Tumor	TCGA-UCEC	Stage III	G3	YES	YES	Post	2	Complete Remission/Response	NO	35.083	Fe.cluster B	>64	>=24	Mutant	Wildtype	Mutant	Wildtype	Dead	Fe.Gene.cluster C	-6.19736	Low Fe.score
TCGA-DF-A2KV-01A	0	TCGA-DF-A2KV	2717	55	Tumor	TCGA-UCEC	Stage I	G3	NO	NO	Post	0			NA	Fe.cluster A	<=64		Mutant	Mutant	Mutant	Wildtype	Alive	Fe.Gene.cluster A	-2.6342	High Fe.score
TCGA-EY-A1GS-01A	1	TCGA-EY-A1GS	670	71	Tumor	TCGA-UCEC	Stage IV	G3			Post		Stable Disease	NO	23.9188	Fe.cluster D	>64	normal	Wildtype	Mutant	Wildtype	Wildtype	Dead	Fe.Gene.cluster C	3.94538	High Fe.score
TCGA-AP-A1E0-01A	0	TCGA-AP-A1E0	1832	40	Tumor	TCGA-UCEC	Stage III	G2			Pre			NO	23.634	Fe.cluster A	<=64	normal	Mutant	Wildtype	Mutant	Mutant	Alive	Fe.Gene.cluster B	-2.57675	High Fe.score
TCGA-BS-A0UT-01A	0	TCGA-BS-A0UT	2212	62	Tumor	TCGA-UCEC	Stage II	G2	NO	YES	Post	3	Complete Remission/Response	NO	28.1337	Fe.cluster A	<=64	>=24	Mutant	Wildtype	Wildtype	Wildtype	Alive	Fe.Gene.cluster C	-0.64691	High Fe.score
TCGA-A5-A0GI-01A	0	TCGA-A5-A0GI	2682	63	Tumor	TCGA-UCEC	Stage I	G2	NO	NO	Post	2	Complete Remission/Response	YES	23.3844	Fe.cluster C	<=64	normal	Mutant	Wildtype	Wildtype	Wildtype	Alive	Fe.Gene.cluster B	-5.50222	Low Fe.score
TCGA-BG-A0VX-01A	0	TCGA-BG-A0VX	1043	58	Tumor	TCGA-UCEC	Stage I	G1	NO	NO	Post		Complete Remission/Response	YES	67.9536	Fe.cluster A	<=64	>=24	Mutant	Wildtype	Wildtype	Wildtype	Alive	Fe.Gene.cluster B	-8.24561	Low Fe.score
TCGA-A5-A1OG-01A	1	TCGA-A5-A1OG	973	65	Tumor	TCGA-UCEC	Stage III	G3	YES	YES	Post	2	Complete Remission/Response	YES	25.6369	Fe.cluster C	>64	>=24	Wildtype	Mutant	Wildtype	Wildtype	Dead	Fe.Gene.cluster C	1.28757	High Fe.score
TCGA-D1-A174-01A	0	TCGA-D1-A174	594	51	Tumor	TCGA-UCEC	Stage I	G3	NO	NO	Indeterminate	3	Complete Remission/Response	YES	26.3702	Fe.cluster A	<=64	>=24	Mutant	Wildtype	Wildtype	Wildtype	Alive	Fe.Gene.cluster B	-10.106	Low Fe.score
TCGA-EY-A1GK-01A	0	TCGA-EY-A1GK	693	74	Tumor	TCGA-UCEC	Stage I	G3	NO	YES	Post	3	Complete Remission/Response	YES	41.0156	Fe.cluster B	>64	>=24	Mutant	Wildtype	Wildtype	Wildtype	Alive	Fe.Gene.cluster A	-5.39051	Low Fe.score
TCGA-EY-A1GX-01A	1	TCGA-EY-A1GX	1127	76	Tumor	TCGA-UCEC	Stage III	G2			Post		Complete Remission/Response	NO	26.9531	Fe.cluster A	>64	>=24	Mutant	Wildtype	Wildtype	Wildtype	Dead	Fe.Gene.cluster C	-0.13628	High Fe.score
TCGA-FI-A2EW-01A	0	TCGA-FI-A2EW	1795	71	Tumor	TCGA-UCEC	Stage II	G3	NO	NO	Post	4+	Complete Remission/Response	NO	32.4219	Fe.cluster C	>64	>=24	Wildtype	Mutant	Wildtype	Wildtype	Alive	Fe.Gene.cluster C	0.909269	High Fe.score
TCGA-D1-A17H-01A	0	TCGA-D1-A17H	852	61	Tumor	TCGA-UCEC	Stage I	G1	NO	YES	Post	0	Complete Remission/Response	NO	34.4222	Fe.cluster C	<=64	>=24	Mutant	Wildtype	Mutant	Wildtype	Alive	Fe.Gene.cluster B	-5.6165	Low Fe.score
TCGA-B5-A0K1-01A	0	TCGA-B5-A0K1	1110	69	Tumor	TCGA-UCEC	Stage I	G1	YES	YES	Post	4+	Complete Remission/Response	NO	38.6445	Fe.cluster B	>64	>=24	Mutant	Wildtype	Wildtype	Wildtype	Alive	Fe.Gene.cluster A	-1.9871	High Fe.score
TCGA-B5-A11N-01A	0	TCGA-B5-A11N	1876	69	Tumor	TCGA-UCEC	Stage I	G1		YES	Post	3	Complete Remission/Response	NO	29.7265	Fe.cluster C	>64	>=24	Mutant	Mutant	Mutant	Mutant	Alive	Fe.Gene.cluster B	-8.29805	Low Fe.score
TCGA-AP-A0LJ-01A	0	TCGA-AP-A0LJ	1421	42	Tumor	TCGA-UCEC	Stage I	G1			Pre			NO	34.626	Fe.cluster A	<=64	>=24	Wildtype	Wildtype	Wildtype	Wildtype	Alive	Fe.Gene.cluster A	-8.84414	Low Fe.score
TCGA-A5-A0GE-01A	0	TCGA-A5-A0GE	3205	38	Tumor	TCGA-UCEC	Stage I	G2	NO	NO	Pre	1	Complete Remission/Response	YES	23.7253	Fe.cluster A	<=64	normal	Mutant	Wildtype	Wildtype	Wildtype	Alive	Fe.Gene.cluster A	-6.86763	Low Fe.score
TCGA-D1-A2G7-01A	1	TCGA-D1-A2G7	1793	65	Tumor	TCGA-UCEC	Stage I	G3	YES	YES	Peri	4+	Complete Remission/Response	NO	49.4497	Fe.cluster B	>64	>=24	Wildtype	Mutant	Wildtype	Wildtype	Dead	Fe.Gene.cluster C	2.35759	High Fe.score
TCGA-B5-A121-01A	0	TCGA-B5-A121	504	57	Tumor	TCGA-UCEC	Stage III	G1		NO	Post	2	Complete Remission/Response	YES	29.3848	Fe.cluster B	<=64	>=24	Wildtype	Wildtype	Wildtype	Wildtype	Alive	Fe.Gene.cluster A	-5.28485	Low Fe.score
TCGA-BG-A0M0-01A	0	TCGA-BG-A0M0	588	66	Tumor	TCGA-UCEC	Stage I	G1	NO	NO	Post		Complete Remission/Response	NO	42.9752	Fe.cluster A	>64	>=24	Wildtype	Wildtype	Wildtype	Wildtype	Alive	Fe.Gene.cluster B	-2.14469	High Fe.score
TCGA-A5-A0R9-01A	0	TCGA-A5-A0R9	749	51	Tumor	TCGA-UCEC	Stage I	G2	NO	NO	Post	1	Complete Remission/Response	YES	54.5749	Fe.cluster A	<=64	>=24	Mutant	Wildtype	Wildtype	Wildtype	Alive	Fe.Gene.cluster B	-6.77233	Low Fe.score
TCGA-BK-A6W4-01A	0	TCGA-BK-A6W4	300	62	Tumor	TCGA-UCEC	Stage I	G2	YES	YES	Post	4+	Complete Remission/Response	YES	43.4095	Fe.cluster B	<=64	>=24	Mutant	Wildtype	Wildtype	Wildtype	Alive	Fe.Gene.cluster B	-3.6226	Low Fe.score
TCGA-A5-A0GH-01A	0	TCGA-A5-A0GH	2254	57	Tumor	TCGA-UCEC	Stage I	G3	NO	NO	Post	0	Complete Remission/Response	NO	20.7008	Fe.cluster C	<=64	normal	Wildtype	Wildtype	Wildtype	Mutant	Alive	Fe.Gene.cluster C	1.07953	High Fe.score
TCGA-A5-A2K2-01A	0	TCGA-A5-A2K2	3595	77	Tumor	TCGA-UCEC	Stage I	G3	NO	NO	Post	0	Complete Remission/Response	NO	20.8117	Fe.cluster C	>64	normal	Wildtype	Mutant	Wildtype	Wildtype	Alive	Fe.Gene.cluster C	0.200386	High Fe.score
TCGA-BK-A13B-01A	0	TCGA-BK-A13B	966	58	Tumor	TCGA-UCEC	Stage I	G3	YES	YES	Post	1	Complete Remission/Response	YES	45.3287	Fe.cluster B	<=64	>=24	Mutant	Wildtype	Wildtype	Mutant	Alive	Fe.Gene.cluster B	-5.90481	Low Fe.score
TCGA-AP-A05N-01A	1	TCGA-AP-A05N	726	58	Tumor	TCGA-UCEC	Stage I	G1			Pre			NO	46.8679	Fe.cluster A	<=64	>=24	Wildtype	Wildtype	Wildtype	Wildtype	Dead	Fe.Gene.cluster B	-2.92531	High Fe.score
TCGA-A5-A0G5-01A	0	TCGA-A5-A0G5	1126	73	Tumor	TCGA-UCEC	Stage I	G3	NO	NO	Post	4+	Complete Remission/Response	YES	18.75	Fe.cluster A	>64	normal	Wildtype	Mutant	Wildtype	Wildtype	Alive	Fe.Gene.cluster C	-8.10907	Low Fe.score
TCGA-BK-A139-01A	1	TCGA-BK-A139	943	74	Tumor	TCGA-UCEC	Stage I	G3	NO	YES	Post	2		NO	24.8777	Fe.cluster D	>64	>=24	Wildtype	Mutant	Wildtype	Wildtype	Dead	Fe.Gene.cluster C	2.53326	High Fe.score
TCGA-PG-A6IB-01A	0	TCGA-PG-A6IB	648	68	Tumor	TCGA-UCEC	Stage I	G3	NO	YES	Post	2	Complete Remission/Response		NA	Fe.cluster B	>64		Mutant	Wildtype	Wildtype	Wildtype	Alive	Fe.Gene.cluster C	-7.6033	Low Fe.score
TCGA-AJ-A3BD-01A	0	TCGA-AJ-A3BD	1039	57	Tumor	TCGA-UCEC	Stage III	G3	NO	YES	Post	2	Complete Remission/Response	YES	36.7902	Fe.cluster C	<=64	>=24	Mutant	Mutant	Wildtype	Wildtype	Alive	Fe.Gene.cluster C	-1.28979	High Fe.score
TCGA-D1-A16J-01A	0	TCGA-D1-A16J	910	61	Tumor	TCGA-UCEC	Stage II	G2	NO	YES	Post	2	Complete Remission/Response	YES	42.9383	Fe.cluster A	<=64	>=24	Wildtype	Wildtype	Wildtype	Wildtype	Alive	Fe.Gene.cluster C	-6.23726	Low Fe.score
TCGA-EO-A3AS-01A	0	TCGA-EO-A3AS	1046	86	Tumor	TCGA-UCEC	Stage I	G3	NO	YES	Post	3	Complete Remission/Response	NO	26.8407	Fe.cluster B	>64	>=24	Mutant	Mutant	Wildtype	Wildtype	Alive	Fe.Gene.cluster C	1.2424	High Fe.score
TCGA-EY-A1GE-01A	0	TCGA-EY-A1GE	741	67	Tumor	TCGA-UCEC	Stage I	G1	NO	YES	Post	4+	Complete Remission/Response	NO	37.8329	Fe.cluster C	>64	>=24	Mutant	Wildtype	Wildtype	Wildtype	Alive	Fe.Gene.cluster A	-5.78603	Low Fe.score
TCGA-A5-A0R6-01A	0	TCGA-A5-A0R6	1153	64	Tumor	TCGA-UCEC	Stage III	G3	NO	NO	Post	2	Complete Remission/Response	YES	27.5873	Fe.cluster A	<=64	>=24	Wildtype	Mutant	Wildtype	Wildtype	Alive	Fe.Gene.cluster C	-2.94121	High Fe.score
TCGA-EO-A3AU-01A	0	TCGA-EO-A3AU	1543	72	Tumor	TCGA-UCEC	Stage II	G3	YES	YES	Post	4+	Complete Remission/Response	YES	34.6667	Fe.cluster A	>64	>=24	Mutant	Wildtype	Mutant	Mutant	Alive	Fe.Gene.cluster C	-4.99001	Low Fe.score
TCGA-EC-A1NJ-01A	0	TCGA-EC-A1NJ	488	73	Tumor	TCGA-UCEC	Stage I	G2			Post				26.4855	Fe.cluster B	>64	>=24	Mutant	Wildtype	Mutant	Mutant	Alive	Fe.Gene.cluster B	-6.39742	Low Fe.score
TCGA-AX-A0J0-01A	0	TCGA-AX-A0J0	1220	47	Tumor	TCGA-UCEC	Stage I	G2			Post	2	Complete Remission/Response	NO	19.9481	Fe.cluster B	<=64	normal	Mutant	Wildtype	Mutant	Mutant	Alive	Fe.Gene.cluster C	-2.29224	High Fe.score
TCGA-AJ-A3QS-01A	0	TCGA-AJ-A3QS	513	57	Tumor	TCGA-UCEC	Stage III	G3	YES	YES	Post	3	Complete Remission/Response	YES	26.079	Fe.cluster B	<=64	>=24	Wildtype	Mutant	Wildtype	Wildtype	Alive	Fe.Gene.cluster C	-1.76368	High Fe.score
TCGA-D1-A17D-01A	0	TCGA-D1-A17D	926	58	Tumor	TCGA-UCEC	Stage I	G3	YES	YES	Post	1	Complete Remission/Response	YES	28.3039	Fe.cluster A	<=64	>=24	Mutant	Wildtype	Wildtype	Wildtype	Alive	Fe.Gene.cluster A	-6.06541	Low Fe.score
TCGA-B5-A3FC-01A	0	TCGA-B5-A3FC	2185	53	Tumor	TCGA-UCEC	Stage II	G3		YES	Post			NO	26.6097	Fe.cluster B	<=64	>=24	Mutant	Mutant	Mutant	Mutant	Alive	Fe.Gene.cluster C	-5.19377	Low Fe.score
TCGA-FI-A2D2-01A	1	TCGA-FI-A2D2	2352	66	Tumor	TCGA-UCEC	Stage I	G3			Post			NO	58.8152	Fe.cluster C	>64	>=24	Wildtype	Mutant	Wildtype	Wildtype	Dead	Fe.Gene.cluster C	-0.20531	High Fe.score
TCGA-A5-A0GX-01A	0	TCGA-A5-A0GX	2088	53	Tumor	TCGA-UCEC	Stage I	G2	NO	NO	Post	1	Complete Remission/Response	YES	40.1547	Fe.cluster A	<=64	>=24	Mutant	Wildtype	Wildtype	Wildtype	Alive	Fe.Gene.cluster B	-8.74198	Low Fe.score
TCGA-BG-A0M7-01A	0	TCGA-BG-A0M7	1937	60	Tumor	TCGA-UCEC	Stage III	G2			Post			YES	39.8438	Fe.cluster A	<=64	>=24	Mutant	Mutant	Wildtype	Wildtype	Alive	Fe.Gene.cluster B	-7.02829	Low Fe.score
TCGA-BG-A0VW-01A	0	TCGA-BG-A0VW	1582	77	Tumor	TCGA-UCEC	Stage I	G1	NO	YES	Post		Complete Remission/Response	NO	37.7297	Fe.cluster C	>64	>=24	Mutant	Wildtype	Mutant	Mutant	Alive	Fe.Gene.cluster A	-4.44111	Low Fe.score
TCGA-AX-A2HF-01A	0	TCGA-AX-A2HF	848	67	Tumor	TCGA-UCEC	Stage I	G3			Post			YES	28.3987	Fe.cluster A	>64	>=24	Wildtype	Mutant	Wildtype	Mutant	Alive	Fe.Gene.cluster C	-0.30875	High Fe.score
TCGA-AX-A0IU-01A	0	TCGA-AX-A0IU	1087	79	Tumor	TCGA-UCEC	Stage III	G3			Post				30.4438	Fe.cluster A	>64	>=24	Wildtype	Mutant	Wildtype	Wildtype	Alive	Fe.Gene.cluster C	-0.97385	High Fe.score
TCGA-A5-A0R8-01A	0	TCGA-A5-A0R8	596	81	Tumor	TCGA-UCEC	Stage I	G2	NO	NO	Post	0	Complete Remission/Response	YES	24.2188	Fe.cluster A	>64	>=24	Mutant	Wildtype	Wildtype	Wildtype	Alive	Fe.Gene.cluster A	-5.80208	Low Fe.score
TCGA-DI-A2QU-01A	1	TCGA-DI-A2QU	946	67	Tumor	TCGA-UCEC	Stage IV	G3			Post				36.3281	Fe.cluster C	>64	>=24	Wildtype	Mutant	Wildtype	Wildtype	Dead	Fe.Gene.cluster C	1.43731	High Fe.score
TCGA-D1-A15W-01A	0	TCGA-D1-A15W	915	58	Tumor	TCGA-UCEC	Stage III	G1	YES	YES	Post	0	Complete Remission/Response	YES	46.281	Fe.cluster B	<=64	>=24	Mutant	Wildtype	Mutant	Wildtype	Alive	Fe.Gene.cluster B	-6.02971	Low Fe.score
TCGA-B5-A0JN-01A	0	TCGA-B5-A0JN	1939	84	Tumor	TCGA-UCEC	Stage IV	G3	NO	YES	Post	0	Complete Remission/Response	NO	24.4561	Fe.cluster B	>64	>=24	Wildtype	Mutant	Wildtype	Wildtype	Alive	Fe.Gene.cluster C	1.69998	High Fe.score
TCGA-B5-A11O-01A	0	TCGA-B5-A11O	2609	62	Tumor	TCGA-UCEC	Stage I	G1	YES	YES	Post	2	Complete Remission/Response	YES	36.388	Fe.cluster A	<=64	>=24	Mutant	Wildtype	Mutant	Wildtype	Alive	Fe.Gene.cluster A	-5.76536	Low Fe.score
TCGA-EY-A548-01A	0	TCGA-EY-A548	430	83	Tumor	TCGA-UCEC	Stage I	G1			Post		Complete Remission/Response	NO	27.1816	Fe.cluster A	>64	>=24	Mutant	Wildtype	Mutant	Wildtype	Alive	Fe.Gene.cluster B	-5.54751	Low Fe.score
TCGA-B5-A11S-01A	0	TCGA-B5-A11S	2229	63	Tumor	TCGA-UCEC	Stage I	G2			Post	2	Complete Remission/Response	NO	47.8721	Fe.cluster B	<=64	>=24	Mutant	Wildtype	Wildtype	Wildtype	Alive	Fe.Gene.cluster B	-3.61352	Low Fe.score
TCGA-AX-A1CP-01A	0	TCGA-AX-A1CP	1107	84	Tumor	TCGA-UCEC	Stage I	G3	YES	YES	Post			NO	22.6003	Fe.cluster C	>64	normal	Wildtype	Mutant	Wildtype	Wildtype	Alive	Fe.Gene.cluster C	2.88313	High Fe.score
TCGA-BK-A0CC-01A	0	TCGA-BK-A0CC	1067	69	Tumor	TCGA-UCEC	Stage III	G3	YES	YES	Post	3	Complete Remission/Response	YES	31.1634	Fe.cluster B	>64	>=24	Wildtype	Mutant	Wildtype	Wildtype	Alive	Fe.Gene.cluster C	0.974291	High Fe.score
TCGA-DI-A1BU-01A	0	TCGA-DI-A1BU	1195	55	Tumor	TCGA-UCEC	Stage II	G3	NO	NO		3	Complete Remission/Response	YES	31.8047	Fe.cluster B	<=64	>=24	Wildtype	Mutant	Mutant	Mutant	Alive	Fe.Gene.cluster C	-5.41326	Low Fe.score
TCGA-AP-A1DP-01A	1	TCGA-AP-A1DP	1081	70	Tumor	TCGA-UCEC	Stage I	G2	YES	YES	Post	3	Complete Remission/Response	YES	33.2479	Fe.cluster B	>64	>=24	Mutant	Wildtype	Wildtype	Wildtype	Dead	Fe.Gene.cluster A	-4.13875	Low Fe.score
TCGA-AX-A06F-01A	0	TCGA-AX-A06F	1748	59	Tumor	TCGA-UCEC	Stage IV	G3			Post			NO	30.854	Fe.cluster C	<=64	>=24	Mutant	Mutant	Wildtype	Mutant	Alive	Fe.Gene.cluster C	-4.74973	Low Fe.score
TCGA-B5-A3FH-01A	0	TCGA-B5-A3FH	841	74	Tumor	TCGA-UCEC	Stage I	G3		YES	Post	3	Complete Remission/Response	NO	33.2031	Fe.cluster B	>64	>=24	Mutant	Wildtype	Wildtype	Wildtype	Alive	Fe.Gene.cluster A	-2.93413	High Fe.score
TCGA-QF-A5YT-01A	0	TCGA-QF-A5YT	1215	57	Tumor	TCGA-UCEC	Stage II	G1	NO	NO	Post	0	Complete Remission/Response	YES	50.519	Fe.cluster B	<=64	>=24	Wildtype	Wildtype	Wildtype	Wildtype	Alive	Fe.Gene.cluster B	-2.26846	High Fe.score
TCGA-B5-A1N2-01A	1	TCGA-B5-A1N2	954	70	Tumor	TCGA-UCEC	Stage III	G3	YES	YES	Post	4+	Complete Remission/Response	YES	40.3912	Fe.cluster C	>64	>=24	Wildtype	Mutant	Wildtype	Wildtype	Dead	Fe.Gene.cluster C	1.78862	High Fe.score
TCGA-EY-A1GD-01A	0	TCGA-EY-A1GD	1639	51	Tumor	TCGA-UCEC	Stage I	G1			Pre		Complete Remission/Response	NO	32.05	Fe.cluster B	<=64	>=24	Mutant	Wildtype	Wildtype	Mutant	Alive	Fe.Gene.cluster B	-5.51834	Low Fe.score
TCGA-AX-A2H8-01A	0	TCGA-AX-A2H8	1861	64	Tumor	TCGA-UCEC	Stage I	G3		YES	Post	3	Complete Remission/Response	YES	44.1406	Fe.cluster A	<=64	>=24	Wildtype	Mutant	Wildtype	Wildtype	Alive	Fe.Gene.cluster C	2.62247	High Fe.score
TCGA-BG-A0VT-01A	0	TCGA-BG-A0VT	1568	56	Tumor	TCGA-UCEC	Stage III	G2	NO	NO	Pre	0	Complete Remission/Response	NO	49.827	Fe.cluster A	<=64	>=24	Wildtype	Wildtype	Wildtype	Wildtype	Alive	Fe.Gene.cluster B	-6.73651	Low Fe.score
TCGA-AX-A2H7-01A	1	TCGA-AX-A2H7	772	87	Tumor	TCGA-UCEC	Stage I	G3	YES	YES		4+	Complete Remission/Response	YES	26.3146	Fe.cluster B	>64	>=24	Wildtype	Wildtype	Wildtype	Wildtype	Dead	Fe.Gene.cluster C	-0.86793	High Fe.score
TCGA-A5-A0VP-01A	0	TCGA-A5-A0VP	1288	74	Tumor	TCGA-UCEC	Stage I	G3	NO	NO	Post	0	Complete Remission/Response	YES	21.83	Fe.cluster B	>64	normal	Mutant	Wildtype	Mutant	Mutant	Alive	Fe.Gene.cluster B	-5.3688	Low Fe.score
TCGA-D1-A17Q-01A	0	TCGA-D1-A17Q	54	54	Tumor	TCGA-UCEC	Stage I	G2	NO	NO	Peri	2	Complete Remission/Response	NO	23.8087	Fe.cluster A	<=64	normal	Mutant	Mutant	Wildtype	Wildtype	Alive	Fe.Gene.cluster B	-3.54998	Low Fe.score
TCGA-DI-A2QY-01A	1	TCGA-DI-A2QY	3349	64	Tumor	TCGA-UCEC	Stage II	G3	NO	YES	Post	2	Complete Remission/Response	YES	33.2031	Fe.cluster C	<=64	>=24	Wildtype	Mutant	Wildtype	Wildtype	Dead	Fe.Gene.cluster C	2.68399	High Fe.score
TCGA-AP-A1DO-01A	0	TCGA-AP-A1DO	952	62	Tumor	TCGA-UCEC	Stage I	G2	NO	NO	Post	0	Complete Remission/Response	NO	32.8731	Fe.cluster A	<=64	>=24	Mutant	Wildtype	Mutant	Wildtype	Alive	Fe.Gene.cluster C	-3.27884	Low Fe.score
TCGA-BG-A0LW-01A	0	TCGA-BG-A0LW	566	47	Tumor	TCGA-UCEC	Stage I	G2			Indeterminate	0	Complete Remission/Response	NO	57.2031	Fe.cluster A	<=64	>=24	Mutant	Wildtype	Wildtype	Wildtype	Alive	Fe.Gene.cluster B	-5.77862	Low Fe.score
TCGA-D1-A161-01A	0	TCGA-D1-A161	892	78	Tumor	TCGA-UCEC	Stage I	G1	NO	YES	Post	3	Complete Remission/Response	NO	28.0843	Fe.cluster B	>64	>=24	Mutant	Mutant	Wildtype	Wildtype	Alive	Fe.Gene.cluster A	-5.58971	Low Fe.score
TCGA-DF-A2KN-01A	0	TCGA-DF-A2KN	67	NA	Tumor	TCGA-UCEC	Stage I	G3			Post		Complete Remission/Response		33.3276	Fe.cluster A		>=24	Mutant	Wildtype	Wildtype	Wildtype	Alive	Fe.Gene.cluster C	-7.88916	Low Fe.score
TCGA-B5-A1MV-01A	0	TCGA-B5-A1MV	1565	84	Tumor	TCGA-UCEC	Stage I	G2		YES	Post	2	Complete Remission/Response	NO	31.5776	Fe.cluster B	>64	>=24	Wildtype	Wildtype	Wildtype	Wildtype	Alive	Fe.Gene.cluster B	-3.38267	Low Fe.score
TCGA-D1-A2G5-01A	0	TCGA-D1-A2G5	1455	50	Tumor	TCGA-UCEC	Stage I	G3	NO	YES	Post	0	Complete Remission/Response	YES	47.7797	Fe.cluster B	<=64	>=24	Mutant	Wildtype	Wildtype	Wildtype	Alive	Fe.Gene.cluster A	-0.33076	High Fe.score
TCGA-D1-A165-01A	0	TCGA-D1-A165	20	64	Tumor	TCGA-UCEC	Stage III	G1	NO	NO	Post	2	Complete Remission/Response	NO	26.556	Fe.cluster B	<=64	>=24	Mutant	Wildtype	Wildtype	Wildtype	Alive	Fe.Gene.cluster B	-3.99891	Low Fe.score
TCGA-EY-A212-01A	1	TCGA-EY-A212	310	83	Tumor	TCGA-UCEC	Stage III	G3	YES	YES	Post	4+	Partial Remission/Response	NO	32.0399	Fe.cluster C	>64	>=24	Wildtype	Mutant	Mutant	Wildtype	Dead	Fe.Gene.cluster C	2.69835	High Fe.score
TCGA-AJ-A5DV-01A	0	TCGA-AJ-A5DV	679	65	Tumor	TCGA-UCEC	Stage I	G3	YES	YES	Post	4+	Complete Remission/Response	NO	57.4219	Fe.cluster D	>64	>=24	Mutant	Wildtype	Wildtype	Wildtype	Alive	Fe.Gene.cluster A	-4.63167	Low Fe.score
TCGA-EY-A1GP-01A	0	TCGA-EY-A1GP	573	54	Tumor	TCGA-UCEC	Stage I	G1	YES	YES	Post	0	Complete Remission/Response	NO	28.8415	Fe.cluster A	<=64	>=24	Wildtype	Wildtype	Wildtype	Wildtype	Alive	Fe.Gene.cluster C	-1.58462	High Fe.score
TCGA-BG-A0W1-01A	0	TCGA-BG-A0W1	122	89	Tumor	TCGA-UCEC	Stage II	G2	NO	NO	Post		Complete Remission/Response	NO	33.1361	Fe.cluster A	>64	>=24	Wildtype	Wildtype	Wildtype	Wildtype	Alive	Fe.Gene.cluster A	-3.86098	Low Fe.score
TCGA-BG-A2AD-01A	0	TCGA-BG-A2AD	609	63	Tumor	TCGA-UCEC	Stage III	G3			Post		Complete Remission/Response	NO	31.25	Fe.cluster C	<=64	>=24					Alive	Fe.Gene.cluster C	0.466245	High Fe.score
TCGA-BG-A3PP-01A	0	TCGA-BG-A3PP	681	82	Tumor	TCGA-UCEC	Stage II	G3			Post		Progressive Disease	YES	NA	Fe.cluster B	>64		Wildtype	Mutant	Wildtype	Wildtype	Alive	Fe.Gene.cluster C	4.27975	High Fe.score
TCGA-AP-A0LT-01A	0	TCGA-AP-A0LT	1497	57	Tumor	TCGA-UCEC	Stage II	G2			Post			NO	33.4252	Fe.cluster A	<=64	>=24	Mutant	Wildtype	Mutant	Wildtype	Alive	Fe.Gene.cluster C	-4.1255	Low Fe.score
TCGA-BG-A0RY-01A	0	TCGA-BG-A0RY	469	68	Tumor	TCGA-UCEC	Stage I	G2	NO	NO	Post		Complete Remission/Response	YES	40.8304	Fe.cluster B	>64	>=24	Mutant	Wildtype	Wildtype	Mutant	Alive	Fe.Gene.cluster B	-4.48041	Low Fe.score
TCGA-BS-A0TE-01A	1	TCGA-BS-A0TE	146	35	Tumor	TCGA-UCEC	Stage IV	G3	NO	NO	Pre	1	Progressive Disease	NO	32.2421	Fe.cluster D	<=64	>=24	Mutant	Wildtype	Wildtype	Wildtype	Dead	Fe.Gene.cluster C	-5.75229	Low Fe.score
TCGA-BS-A0V7-01A	0	TCGA-BS-A0V7	1934	48	Tumor	TCGA-UCEC	Stage I	G1	YES	YES	Pre	2	Complete Remission/Response	NO	35.2941	Fe.cluster A	<=64	>=24	Wildtype	Wildtype	Mutant	Wildtype	Alive	Fe.Gene.cluster B	-9.20823	Low Fe.score
TCGA-BK-A56F-01A	0	TCGA-BK-A56F	401	75	Tumor	TCGA-UCEC	Stage I	G1	YES	YES	Post	4+	Complete Remission/Response	YES	31.6158	Fe.cluster B	>64	>=24	Wildtype	Wildtype	Wildtype	Wildtype	Alive	Fe.Gene.cluster A	-3.69782	Low Fe.score
TCGA-BK-A26L-01A	0	TCGA-BK-A26L	734	71	Tumor	TCGA-UCEC	Stage III	G3	NO	YES	Post	3	Complete Remission/Response	YES	32.4619	Fe.cluster B	>64	>=24	Wildtype	Mutant	Wildtype	Wildtype	Alive	Fe.Gene.cluster C	1.78127	High Fe.score
TCGA-SL-A6JA-01A	0	TCGA-SL-A6JA	7	77	Tumor	TCGA-UCEC	Stage I	G3			Post		Complete Remission/Response	NO	46.2548	Fe.cluster B	>64	>=24	Wildtype	Wildtype	Mutant	Wildtype	Alive	Fe.Gene.cluster C	-0.94048	High Fe.score
TCGA-D1-A17A-01A	0	TCGA-D1-A17A	48	59	Tumor	TCGA-UCEC	Stage II	G3	NO	NO	Post	2	Complete Remission/Response	NO	32.9287	Fe.cluster C	<=64	>=24	Mutant	Wildtype	Mutant	Wildtype	Alive	Fe.Gene.cluster A	-7.25147	Low Fe.score
TCGA-BK-A4ZD-01A	0	TCGA-BK-A4ZD	506	42	Tumor	TCGA-UCEC	Stage I	G3	YES	YES	Pre	3	Complete Remission/Response	NO	53.4457	Fe.cluster B	<=64	>=24	Mutant	Mutant	Wildtype	Wildtype	Alive	Fe.Gene.cluster C	-0.29695	High Fe.score
TCGA-BK-A139-01C	1	TCGA-BK-A139	943	74	Tumor	TCGA-UCEC	Stage I	G3	NO	YES	Post	2		NO	24.8777	Fe.cluster B	>64	>=24					Dead	Fe.Gene.cluster C	2.41456	High Fe.score
TCGA-AX-A05Y-01A	0	TCGA-AX-A05Y	2684	57	Tumor	TCGA-UCEC	Stage I	G1			Post			NO	33.3866	Fe.cluster C	<=64	>=24	Mutant	Wildtype	Wildtype	Wildtype	Alive	Fe.Gene.cluster B	-2.29779	High Fe.score
TCGA-A5-A2K7-01A	0	TCGA-A5-A2K7	1063	41	Tumor	TCGA-UCEC	Stage II	G3	YES	YES	Pre	3	Complete Remission/Response	YES	29.2101	Fe.cluster C	<=64	>=24	Mutant	Wildtype	Wildtype	Wildtype	Alive	Fe.Gene.cluster C	2.82048	High Fe.score
TCGA-D1-A0ZP-01A	0	TCGA-D1-A0ZP	911	59	Tumor	TCGA-UCEC	Stage IV	G3	NO	NO	Post	1	Complete Remission/Response	YES	22.3757	Fe.cluster B	<=64	normal	Mutant	Wildtype	Wildtype	Wildtype	Alive	Fe.Gene.cluster C	2.81057	High Fe.score
TCGA-AJ-A3BF-01A	0	TCGA-AJ-A3BF	551	65	Tumor	TCGA-UCEC	Stage III	G3	NO	YES	Post		Complete Remission/Response	YES	39.1003	Fe.cluster C	>64	>=24	Wildtype	Mutant	Wildtype	Wildtype	Alive	Fe.Gene.cluster C	1.27442	High Fe.score
TCGA-BS-A0UF-01A	0	TCGA-BS-A0UF	2611	65	Tumor	TCGA-UCEC	Stage I	G3	NO	NO	Post	3	Complete Remission/Response	NO	26.3779	Fe.cluster A	>64	>=24	Mutant	Mutant	Wildtype	Mutant	Alive	Fe.Gene.cluster B	-4.96338	Low Fe.score
TCGA-BS-A0U9-01B	0	TCGA-BS-A0U9	2825	59	Tumor	TCGA-UCEC	Stage II	G3	YES	YES	Post	4+	Complete Remission/Response	NO	34.2561	Fe.cluster C	<=64	>=24					Alive	Fe.Gene.cluster C	2.13898	High Fe.score
TCGA-AP-A05A-01A	1	TCGA-AP-A05A	1944	81	Tumor	TCGA-UCEC	Stage II	G3			Post			NO	NA	Fe.cluster C	>64		Wildtype	Mutant	Wildtype	Wildtype	Dead	Fe.Gene.cluster C	2.59875	High Fe.score
TCGA-EO-A3B0-01A	0	TCGA-EO-A3B0	1412	43	Tumor	TCGA-UCEC	Stage III	G3		NO	Indeterminate	2		NO	22.9398	Fe.cluster C	<=64	normal	Mutant	Wildtype	Mutant	Mutant	Alive	Fe.Gene.cluster C	-5.48453	Low Fe.score
TCGA-D1-A175-01A	0	TCGA-D1-A175	202	48	Tumor	TCGA-UCEC	Stage I	G3	NO	NO	Indeterminate	3	Complete Remission/Response	YES	24.6904	Fe.cluster C	<=64	>=24					Alive	Fe.Gene.cluster C	-1.13921	High Fe.score
TCGA-AX-A3G4-01A	0	TCGA-AX-A3G4	9	60	Tumor	TCGA-UCEC	Stage III	G3			Post				38.3664	Fe.cluster C	<=64	>=24	Mutant	Mutant	Wildtype	Wildtype	Alive	Fe.Gene.cluster C	0.698468	High Fe.score
TCGA-BS-A0TA-01A	1	TCGA-BS-A0TA	740	58	Tumor	TCGA-UCEC	Stage IV	G3	YES	YES	Post	0	Stable Disease	YES	38.9543	Fe.cluster A	<=64	>=24	Mutant	Wildtype	Wildtype	Wildtype	Dead	Fe.Gene.cluster C	-5.96946	Low Fe.score
TCGA-B5-A0K3-01A	1	TCGA-B5-A0K3	830	62	Tumor	TCGA-UCEC	Stage I	G3	YES	YES	Post	4+		NO	32.7186	Fe.cluster C	<=64	>=24	Wildtype	Mutant	Mutant	Wildtype	Dead	Fe.Gene.cluster C	2.80314	High Fe.score
TCGA-B5-A3S1-01A	0	TCGA-B5-A3S1	902	71	Tumor	TCGA-UCEC	Stage III	G3	NO	NO	Post	1	Complete Remission/Response	YES	28.3039	Fe.cluster C	>64	>=24	Wildtype	Mutant	Wildtype	Wildtype	Alive	Fe.Gene.cluster C	2.03516	High Fe.score
TCGA-KJ-A3U4-01A	0	TCGA-KJ-A3U4	1095	55	Tumor	TCGA-UCEC	Stage I	G1	NO	NO	Post	2		NO	35.2617	Fe.cluster C	<=64	>=24	Wildtype	Mutant	Mutant	Wildtype	Alive	Fe.Gene.cluster C	-0.91567	High Fe.score
TCGA-EO-A3B1-01A	0	TCGA-EO-A3B1	820	63	Tumor	TCGA-UCEC	Stage I	G3	NO	NO	Post		Complete Remission/Response	YES	32.1799	Fe.cluster A	<=64	>=24	Wildtype	Mutant	Wildtype	Wildtype	Alive	Fe.Gene.cluster C	1.98023	High Fe.score
TCGA-EY-A2OO-01A	0	TCGA-EY-A2OO	1392	56	Tumor	TCGA-UCEC	Stage I	G3	NO	NO	Post	0	Complete Remission/Response	YES	25.7959	Fe.cluster A	<=64	>=24	Mutant	Wildtype	Mutant	Wildtype	Alive	Fe.Gene.cluster C	0.229897	High Fe.score
TCGA-AJ-A3I9-01A	1	TCGA-AJ-A3I9	519	52	Tumor	TCGA-UCEC	Stage II	G3	NO	NO	Post	0	Complete Remission/Response	YES	28.125	Fe.cluster C	<=64	>=24	Mutant	Mutant	Wildtype	Wildtype	Dead	Fe.Gene.cluster C	1.71191	High Fe.score
TCGA-B5-A0KB-01B	0	TCGA-B5-A0KB	824	62	Tumor	TCGA-UCEC	Stage I	G3			Post	1	Complete Remission/Response	YES	29.3199	Fe.cluster A	<=64	>=24	Wildtype	Mutant	Wildtype	Wildtype	Alive	Fe.Gene.cluster C	-0.10358	High Fe.score
TCGA-AP-A1DK-01A	0	TCGA-AP-A1DK	2767	53	Tumor	TCGA-UCEC	Stage I	G3			Post			YES	21.875	Fe.cluster C	<=64	normal	Mutant	Wildtype	Mutant	Mutant	Alive	Fe.Gene.cluster C	-5.44837	Low Fe.score
TCGA-D1-A177-01A	0	TCGA-D1-A177	548	70	Tumor	TCGA-UCEC	Stage I	G2	NO	NO	Post	2	Complete Remission/Response	YES	22.9398	Fe.cluster B	>64	normal	Mutant	Wildtype	Wildtype	Wildtype	Alive	Fe.Gene.cluster C	-4.54264	Low Fe.score
TCGA-BG-A0M3-01A	0	TCGA-BG-A0M3	1071	74	Tumor	TCGA-UCEC	Stage I	G2	NO	NO	Post		Complete Remission/Response	YES	29.2969	Fe.cluster A	>64	>=24	Mutant	Wildtype	Wildtype	Wildtype	Alive	Fe.Gene.cluster B	-4.27108	Low Fe.score
TCGA-BS-A0UV-01A	0	TCGA-BS-A0UV	2228	55	Tumor	TCGA-UCEC	Stage III	G3	YES	YES	Post	4+	Complete Remission/Response	NO	39.6825	Fe.cluster C	<=64	>=24	Mutant	Mutant	Wildtype	Mutant	Alive	Fe.Gene.cluster C	-0.48348	High Fe.score
TCGA-D1-A16Y-01A	0	TCGA-D1-A16Y	532	56	Tumor	TCGA-UCEC	Stage I	G1	NO	NO	Post	3	Complete Remission/Response	NO	35.7495	Fe.cluster A	<=64	>=24	Mutant	Mutant	Mutant	Mutant	Alive	Fe.Gene.cluster B	-1.34833	High Fe.score
TCGA-AJ-A3BI-01A	0	TCGA-AJ-A3BI	575	67	Tumor	TCGA-UCEC	Stage I	G3	YES	YES	Post			NO	40.5696	Fe.cluster A	>64	>=24	Mutant	Wildtype	Wildtype	Wildtype	Alive	Fe.Gene.cluster C	-2.14625	High Fe.score
TCGA-EY-A1GF-01A	0	TCGA-EY-A1GF	826	75	Tumor	TCGA-UCEC	Stage I	G2	NO	YES	Post	2	Complete Remission/Response	NO	26.079	Fe.cluster B	>64	>=24	Mutant	Wildtype	Wildtype	Wildtype	Alive	Fe.Gene.cluster A	-3.6151	Low Fe.score
TCGA-D1-A17U-01A	0	TCGA-D1-A17U	697	53	Tumor	TCGA-UCEC	Stage III	G2	NO	NO	Post	0	Complete Remission/Response	YES	30.8248	Fe.cluster D	<=64	>=24	Wildtype	Mutant	Mutant	Wildtype	Alive	Fe.Gene.cluster B	-5.96604	Low Fe.score
TCGA-D1-A0ZZ-01A	0	TCGA-D1-A0ZZ	686	80	Tumor	TCGA-UCEC	Stage I	G3	NO	NO	Post	4+	Complete Remission/Response	YES	21.5045	Fe.cluster B	>64	normal	Wildtype	Mutant	Wildtype	Wildtype	Alive	Fe.Gene.cluster C	0.529638	High Fe.score
TCGA-A5-A0GD-01A	1	TCGA-A5-A0GD	3423	75	Tumor	TCGA-UCEC	Stage I	G2	NO	NO	Post	4+	Complete Remission/Response	NO	27.852	Fe.cluster A	>64	>=24	Wildtype	Wildtype	Wildtype	Wildtype	Dead	Fe.Gene.cluster A	-6.16608	Low Fe.score
TCGA-AP-A05J-01A	0	TCGA-AP-A05J	1122	66	Tumor	TCGA-UCEC	Stage II	G3			Post			NO	27.9904	Fe.cluster C	>64	>=24	Wildtype	Mutant	Wildtype	Wildtype	Alive	Fe.Gene.cluster C	3.90576	High Fe.score
TCGA-4E-A92E-01A	0	TCGA-4E-A92E	13	54	Tumor	TCGA-UCEC	Stage I	G1	NO	YES	Post	1	Complete Remission/Response	NO	28.959	Fe.cluster B	<=64	>=24	Mutant	Wildtype	Wildtype	Wildtype	Alive	Fe.Gene.cluster B	-5.32701	Low Fe.score
TCGA-BG-A18A-01A	0	TCGA-BG-A18A	426	74	Tumor	TCGA-UCEC	Stage I	G1	NO	YES	Post	2	Complete Remission/Response	YES	32.0073	Fe.cluster A	>64	>=24	Mutant	Wildtype	Wildtype	Wildtype	Alive	Fe.Gene.cluster B	-6.39504	Low Fe.score
TCGA-KP-A3VZ-01A	0	TCGA-KP-A3VZ	722	69	Tumor	TCGA-UCEC	Stage IV	High Grade			Post				20.7008	Fe.cluster C	>64	normal	Wildtype	Mutant	Wildtype	Wildtype	Alive	Fe.Gene.cluster C	3.77977	High Fe.score
TCGA-EC-A24G-01A	0	TCGA-EC-A24G	511	57	Tumor	TCGA-UCEC	Stage II	G3	NO	YES	Pre	3	Complete Remission/Response	YES	42.458	Fe.cluster B	<=64	>=24	Mutant	Wildtype	Mutant	Wildtype	Alive	Fe.Gene.cluster A	-7.31574	Low Fe.score
TCGA-AX-A1C4-01A	0	TCGA-AX-A1C4	404	52	Tumor	TCGA-UCEC	Stage I	G2	YES	YES	Indeterminate	0		YES	36.2959	Fe.cluster C	<=64	>=24	Mutant	Wildtype	Wildtype	Wildtype	Alive	Fe.Gene.cluster C	-0.54205	High Fe.score
TCGA-BG-A0VV-01A	0	TCGA-BG-A0VV	1553	53	Tumor	TCGA-UCEC	Stage I	G1	YES	NO	Pre	3	Complete Remission/Response	NO	56.0128	Fe.cluster B	<=64	>=24	Wildtype	Wildtype	Wildtype	Wildtype	Alive	Fe.Gene.cluster A	-4.82821	Low Fe.score
TCGA-EY-A1G7-01A	1	TCGA-EY-A1G7	189	86	Tumor	TCGA-UCEC	Stage II	G2	NO	NO	Post	4+	Complete Remission/Response	NO	37.2791	Fe.cluster B	>64	>=24	Mutant	Wildtype	Mutant	Wildtype	Dead	Fe.Gene.cluster C	4.45241	High Fe.score
TCGA-AJ-A8CT-01A	0	TCGA-AJ-A8CT	82	58	Tumor	TCGA-UCEC	Stage I	G1			Post		Complete Remission/Response		42.2406	Fe.cluster B	<=64	>=24	Mutant	Wildtype	Wildtype	Wildtype	Alive	Fe.Gene.cluster A	-8.35317	Low Fe.score
TCGA-BG-A0M4-01A	0	TCGA-BG-A0M4	2167	60	Tumor	TCGA-UCEC	Stage I	G3			Post			NO	30.6148	Fe.cluster D	<=64	>=24	Wildtype	Wildtype	Wildtype	Wildtype	Alive	Fe.Gene.cluster B	-2.91848	High Fe.score
TCGA-BG-A0VZ-01A	0	TCGA-BG-A0VZ	1601	58	Tumor	TCGA-UCEC	Stage III	G1	NO	YES	Post	1	Complete Remission/Response	NO	40.0367	Fe.cluster B	<=64	>=24	Mutant	Wildtype	Mutant	Wildtype	Alive	Fe.Gene.cluster B	-3.56963	Low Fe.score
TCGA-QS-A744-01A	0	TCGA-QS-A744	451	86	Tumor	TCGA-UCEC	Stage III	G2	NO	YES	Post	4+		NO	28.6048	Fe.cluster B	>64	>=24	Wildtype	Wildtype	Wildtype	Wildtype	Alive	Fe.Gene.cluster C	1.93181	High Fe.score
TCGA-FI-A2D6-01A	1	TCGA-FI-A2D6	767	74	Tumor	TCGA-UCEC	Stage I	G3			Post			NO	34.8944	Fe.cluster B	>64	>=24	Mutant	Wildtype	Mutant	Wildtype	Dead	Fe.Gene.cluster C	-2.78702	High Fe.score
TCGA-A5-A0G3-01A	0	TCGA-A5-A0G3	1428	61	Tumor	TCGA-UCEC	Stage III	G3	NO	YES	Post	2	Complete Remission/Response	YES	23.5078	Fe.cluster C	<=64	normal	Wildtype	Mutant	Wildtype	Wildtype	Alive	Fe.Gene.cluster C	4.14063	High Fe.score
TCGA-AX-A3G9-01A	0	TCGA-AX-A3G9	558	63	Tumor	TCGA-UCEC	Stage III	G3				2		YES	25.2994	Fe.cluster A	<=64	>=24	Mutant	Wildtype	Wildtype	Wildtype	Alive	Fe.Gene.cluster C	-1.016	High Fe.score
TCGA-QS-A8F1-01A	1	TCGA-QS-A8F1	135	85	Tumor	TCGA-UCEC	Stage III	G3	NO	NO	Post	0	Progressive Disease	NO	26.5731	Fe.cluster C	>64	>=24	Wildtype	Mutant	Wildtype	Wildtype	Dead	Fe.Gene.cluster C	4.33563	High Fe.score
TCGA-BK-A0C9-01A	0	TCGA-BK-A0C9	1092	57	Tumor	TCGA-UCEC	Stage I	G1	NO	YES	Post	0	Complete Remission/Response	NO	44.9972	Fe.cluster D	<=64	>=24	Mutant	Wildtype	Wildtype	Wildtype	Alive	Fe.Gene.cluster A	-6.20241	Low Fe.score
TCGA-D1-A1O8-01A	1	TCGA-D1-A1O8	120	70	Tumor	TCGA-UCEC	Stage III	G3	NO	YES	Post	0	Complete Remission/Response	NO	31.2213	Fe.cluster C	>64	>=24	Mutant	Wildtype	Wildtype	Wildtype	Dead	Fe.Gene.cluster C	-5.27067	Low Fe.score
TCGA-BS-A0U8-01A	0	TCGA-BS-A0U8	2963	55	Tumor	TCGA-UCEC	Stage III	G1	NO	NO	Post	0	Complete Remission/Response	YES	28.3737	Fe.cluster C	<=64	>=24	Mutant	Wildtype	Mutant	Mutant	Alive	Fe.Gene.cluster B	-3.77791	Low Fe.score
TCGA-EO-A22R-01A	0	TCGA-EO-A22R	1878	56	Tumor	TCGA-UCEC	Stage I	G3	YES	NO	Post	4+	Complete Remission/Response	YES	31.1791	Fe.cluster C	<=64	>=24	Mutant	Wildtype	Mutant	Mutant	Alive	Fe.Gene.cluster C	-2.52213	High Fe.score
TCGA-B5-A11Q-01A	0	TCGA-B5-A11Q	976	64	Tumor	TCGA-UCEC	Stage III	G1		YES	Post	0	Complete Remission/Response	YES	33.9493	Fe.cluster B	<=64	>=24	Mutant	Wildtype	Wildtype	Wildtype	Alive	Fe.Gene.cluster B	-5.24819	Low Fe.score
TCGA-B5-A3FD-01A	1	TCGA-B5-A3FD	1197	70	Tumor	TCGA-UCEC	Stage I	G3		YES	Indeterminate			NO	37.9839	Fe.cluster B	>64	>=24	Mutant	Mutant	Wildtype	Wildtype	Dead	Fe.Gene.cluster C	-1.83979	High Fe.score
TCGA-AJ-A3NE-01A	0	TCGA-AJ-A3NE	628	46	Tumor	TCGA-UCEC	Stage I	G3		YES	Pre	3	Complete Remission/Response	NO	31.25	Fe.cluster B	<=64	>=24					Alive	Fe.Gene.cluster C	-5.36658	Low Fe.score
TCGA-EY-A1GM-01A	1	TCGA-EY-A1GM	995	60	Tumor	TCGA-UCEC	Stage III	G3			Post		Complete Remission/Response	NO	28.8044	Fe.cluster B	<=64	>=24	Wildtype	Mutant	Wildtype	Wildtype	Dead	Fe.Gene.cluster C	-2.93055	High Fe.score
TCGA-EY-A547-01A	0	TCGA-EY-A547	545	75	Tumor	TCGA-UCEC	Stage I	G3			Post			YES	39.1929	Fe.cluster C	>64	>=24	Wildtype	Mutant	Wildtype	Wildtype	Alive	Fe.Gene.cluster C	2.72755	High Fe.score
TCGA-AX-A3G7-01A	0	TCGA-AX-A3G7	9	71	Tumor	TCGA-UCEC	Stage IV	G3							31.2026	Fe.cluster C	>64	>=24	Mutant	Mutant	Wildtype	Wildtype	Alive	Fe.Gene.cluster C	1.54939	High Fe.score
TCGA-D1-A16X-01A	0	TCGA-D1-A16X	111	54	Tumor	TCGA-UCEC	Stage I	G2	NO	NO	Post	3	Complete Remission/Response	NO	39.4531	Fe.cluster A	<=64	>=24	Mutant	Wildtype	Wildtype	Mutant	Alive	Fe.Gene.cluster B	-7.62413	Low Fe.score
TCGA-DI-A0WH-01A	0	TCGA-DI-A0WH	496	64	Tumor	TCGA-UCEC	Stage I	G3	YES	YES		2	Complete Remission/Response	YES	35.7513	Fe.cluster A	<=64	>=24	Wildtype	Wildtype	Wildtype	Wildtype	Alive	Fe.Gene.cluster C	-2.59822	High Fe.score
TCGA-EY-A2OM-01A	0	TCGA-EY-A2OM	694	55	Tumor	TCGA-UCEC	Stage I	G3	NO	NO	Post	2	Complete Remission/Response	YES	47.6108	Fe.cluster C	<=64	>=24	Mutant	Wildtype	Mutant	Wildtype	Alive	Fe.Gene.cluster C	-0.18775	High Fe.score
TCGA-AJ-A2QM-01A	0	TCGA-AJ-A2QM	894	67	Tumor	TCGA-UCEC	Stage II	G3	NO	YES	Post		Complete Remission/Response	YES	25.6055	Fe.cluster B	>64	>=24	Wildtype	Mutant	Wildtype	Wildtype	Alive	Fe.Gene.cluster C	5.0777	High Fe.score
TCGA-BG-A0MA-01A	1	TCGA-BG-A0MA	326	60	Tumor	TCGA-UCEC	Stage I	G3			Post			NO	38.4083	Fe.cluster C	<=64	>=24	Mutant	Wildtype	Wildtype	Wildtype	Dead	Fe.Gene.cluster B	-5.29523	Low Fe.score
TCGA-AP-A0LH-01A	1	TCGA-AP-A0LH	1106	60	Tumor	TCGA-UCEC	Stage I	G3	NO	NO	Post	2	Complete Remission/Response	YES	30.8596	Fe.cluster A	<=64	>=24	Wildtype	Mutant	Wildtype	Wildtype	Dead	Fe.Gene.cluster C	-1.73907	High Fe.score
TCGA-AJ-A2QO-01A	1	TCGA-AJ-A2QO	1045	85	Tumor	TCGA-UCEC	Stage I	G3	NO	YES	Post	2	Complete Remission/Response	NO	24.6097	Fe.cluster D	>64	>=24	Mutant	Wildtype	Wildtype	Wildtype	Dead	Fe.Gene.cluster C	-2.98036	High Fe.score
TCGA-D1-A17T-01A	0	TCGA-D1-A17T	71	67	Tumor	TCGA-UCEC	Stage I	G2	NO	YES	Post	0	Complete Remission/Response	NO	32.831	Fe.cluster A	>64	>=24	Mutant	Wildtype	Wildtype	Wildtype	Alive	Fe.Gene.cluster B	-5.30791	Low Fe.score
TCGA-AP-A056-01A	0	TCGA-AP-A056	2618	64	Tumor	TCGA-UCEC	Stage II	G3			Post			NO	24.5603	Fe.cluster C	<=64	>=24	Wildtype	Wildtype	Mutant	Mutant	Alive	Fe.Gene.cluster C	-4.8656	Low Fe.score
TCGA-BS-A0U7-01A	1	TCGA-BS-A0U7	935	63	Tumor	TCGA-UCEC	Stage I	G2	NO	NO	Post	0	Complete Remission/Response	NO	24.2424	Fe.cluster D	<=64	>=24	Mutant	Wildtype	Wildtype	Wildtype	Dead	Fe.Gene.cluster C	-6.48888	Low Fe.score
TCGA-A5-AB3J-01A	0	TCGA-A5-AB3J	512	52	Tumor	TCGA-UCEC	Stage II	G2	YES	YES	Peri	0	Complete Remission/Response	YES	23.0469	Fe.cluster B	<=64	normal	Wildtype	Wildtype	Wildtype	Wildtype	Alive	Fe.Gene.cluster B	-8.1271	Low Fe.score
TCGA-B5-A0JX-01A	0	TCGA-B5-A0JX	1787	62	Tumor	TCGA-UCEC	Stage I	G3		YES	Post	1	Complete Remission/Response	NO	40.0369	Fe.cluster A	<=64	>=24	Mutant	Wildtype	Wildtype	Wildtype	Alive	Fe.Gene.cluster B	-6.25058	Low Fe.score
TCGA-QS-A5YQ-01A	0	TCGA-QS-A5YQ	759	55	Tumor	TCGA-UCEC	Stage III	G1	NO	NO	Post	1	Complete Remission/Response	YES	32.4219	Fe.cluster B	<=64	>=24	Mutant	Wildtype	Mutant	Wildtype	Alive	Fe.Gene.cluster A	-8.59992	Low Fe.score
TCGA-AX-A062-01A	0	TCGA-AX-A062	1399	53	Tumor	TCGA-UCEC	Stage I	G1			Indeterminate	1	Complete Remission/Response	NO	40.7631	Fe.cluster A	<=64	>=24	Wildtype	Wildtype	Wildtype	Wildtype	Alive	Fe.Gene.cluster C	-0.18718	High Fe.score
TCGA-BG-A0MC-01A	0	TCGA-BG-A0MC	1263	74	Tumor	TCGA-UCEC	Stage I	G1	YES	YES	Post		Complete Remission/Response	NO	56.1915	Fe.cluster A	>64	>=24	Mutant	Wildtype	Mutant	Wildtype	Alive	Fe.Gene.cluster A	-8.28781	Low Fe.score
TCGA-D1-A0ZN-01A	0	TCGA-D1-A0ZN	512	60	Tumor	TCGA-UCEC	Stage I	G1	NO	YES	Peri	2	Complete Remission/Response	YES	29.0533	Fe.cluster B	<=64	>=24	Mutant	Wildtype	Wildtype	Wildtype	Alive	Fe.Gene.cluster B	-6.99208	Low Fe.score
TCGA-EY-A4KR-01A	1	TCGA-EY-A4KR	346	56	Tumor	TCGA-UCEC	Stage III	G3			Post		Progressive Disease	YES	42.3855	Fe.cluster C	<=64	>=24	Wildtype	Mutant	Mutant	Wildtype	Dead	Fe.Gene.cluster C	-0.93437	High Fe.score
TCGA-A5-A7WK-01A	0	TCGA-A5-A7WK	560	71	Tumor	TCGA-UCEC	Stage I	G3	YES	NO	Post	4+	Complete Remission/Response	NO	34.3679	Fe.cluster B	>64	>=24	Wildtype	Mutant	Wildtype	Wildtype	Alive	Fe.Gene.cluster C	5.10747	High Fe.score
TCGA-EY-A3L3-01A	0	TCGA-EY-A3L3	832	82	Tumor	TCGA-UCEC	Stage I	G3	NO	YES	Post	4+	Complete Remission/Response	YES	35.4925	Fe.cluster B	>64	>=24	Wildtype	Mutant	Wildtype	Wildtype	Alive	Fe.Gene.cluster C	2.86147	High Fe.score
TCGA-AJ-A3IA-01A	0	TCGA-AJ-A3IA	633	77	Tumor	TCGA-UCEC	Stage I	G3	NO	NO	Post	2	Complete Remission/Response	NO	23.5304	Fe.cluster B	>64	normal	Wildtype	Mutant	Wildtype	Wildtype	Alive	Fe.Gene.cluster C	-1.14123	High Fe.score
TCGA-EO-A22S-01A	0	TCGA-EO-A22S	1872	58	Tumor	TCGA-UCEC	Stage I	G3	NO	YES	Post	2	Complete Remission/Response	YES	34.5168	Fe.cluster C	<=64	>=24	Mutant	Wildtype	Mutant	Wildtype	Alive	Fe.Gene.cluster C	0.200043	High Fe.score
TCGA-B5-A0JU-01B	0	TCGA-B5-A0JU	1802	57	Tumor	TCGA-UCEC	Stage I	G2		YES	Post	2		NO	54.879	Fe.cluster B	<=64	>=24	Mutant	Mutant	Mutant	Wildtype	Alive	Fe.Gene.cluster B	-2.42941	High Fe.score
TCGA-D1-A16B-01A	0	TCGA-D1-A16B	1106	64	Tumor	TCGA-UCEC	Stage I	G2	NO	NO	Post	2	Complete Remission/Response	NO	34.0176	Fe.cluster A	<=64	>=24	Mutant	Wildtype	Wildtype	Wildtype	Alive	Fe.Gene.cluster B	-6.24041	Low Fe.score
TCGA-AX-A3FX-01A	1	TCGA-AX-A3FX	1333	69	Tumor	TCGA-UCEC	Stage II	G3			Post			NO	38.2866	Fe.cluster C	>64	>=24	Mutant	Wildtype	Wildtype	Wildtype	Dead	Fe.Gene.cluster C	-0.17496	High Fe.score
TCGA-AX-A1CF-01A	0	TCGA-AX-A1CF	2337	69	Tumor	TCGA-UCEC	Stage IV	G3					Progressive Disease	YES	35.1111	Fe.cluster C	>64	>=24	Wildtype	Mutant	Wildtype	Wildtype	Alive	Fe.Gene.cluster C	-3.18896	High Fe.score
TCGA-A5-A0GA-01A	1	TCGA-A5-A0GA	543	67	Tumor	TCGA-UCEC	Stage III	G3	NO	NO	Post	1	Partial Remission/Response	NO	31.1419	Fe.cluster B	>64	>=24	Wildtype	Wildtype	Mutant	Wildtype	Dead	Fe.Gene.cluster C	-2.94777	High Fe.score
TCGA-SJ-A6ZJ-01A	0	TCGA-SJ-A6ZJ	556	61	Tumor	TCGA-UCEC	Stage I	G2	NO	YES	Post	1	Complete Remission/Response	YES	46.7687	Fe.cluster A	<=64	>=24	Mutant	Wildtype	Wildtype	Wildtype	Alive	Fe.Gene.cluster A	-4.74612	Low Fe.score
TCGA-AX-A3FT-01A	0	TCGA-AX-A3FT	6	64	Tumor	TCGA-UCEC	Stage I	G3			Post				31.6346	Fe.cluster A	<=64	>=24	Wildtype	Wildtype	Wildtype	Wildtype	Alive	Fe.Gene.cluster C	-6.4145	Low Fe.score
TCGA-AP-A0LD-01A	0	TCGA-AP-A0LD	3589	63	Tumor	TCGA-UCEC	Stage I	G3			Post			NO	27.2392	Fe.cluster C	<=64	>=24	Mutant	Wildtype	Mutant	Mutant	Alive	Fe.Gene.cluster C	2.09115	High Fe.score
TCGA-AJ-A3OL-01A	1	TCGA-AJ-A3OL	449	55	Tumor	TCGA-UCEC	Stage III	G3	NO	YES	Post	2	Complete Remission/Response	NO	25	Fe.cluster B	<=64	>=24	Mutant	Mutant	Wildtype	Wildtype	Dead	Fe.Gene.cluster C	4.2916	High Fe.score
TCGA-AP-A052-01A	1	TCGA-AP-A052	669	59	Tumor	TCGA-UCEC	Stage IV	G3	NO	NO	Post	1	Complete Remission/Response	NO	46.281	Fe.cluster C	<=64	>=24	Wildtype	Mutant	Wildtype	Wildtype	Dead	Fe.Gene.cluster C	5.01296	High Fe.score
TCGA-D1-A15X-01A	0	TCGA-D1-A15X	909	45	Tumor	TCGA-UCEC	Stage I	High Grade	NO	NO	Pre	2	Complete Remission/Response	YES	25.2092	Fe.cluster A	<=64	>=24	Wildtype	Wildtype	Mutant	Mutant	Alive	Fe.Gene.cluster C	-7.40747	Low Fe.score
TCGA-EY-A1GW-01A	1	TCGA-EY-A1GW	337	73	Tumor	TCGA-UCEC	Stage IV	G3	NO	YES	Post	2	Progressive Disease	NO	36.4848	Fe.cluster C	>64	>=24	Mutant	Wildtype	Wildtype	Wildtype	Dead	Fe.Gene.cluster B	-0.45013	High Fe.score
TCGA-B5-A3FB-01A	0	TCGA-B5-A3FB	2844	73	Tumor	TCGA-UCEC	Stage I	G3	YES	YES	Post			NO	39.7924	Fe.cluster B	>64	>=24	Wildtype	Wildtype	Wildtype	Wildtype	Alive	Fe.Gene.cluster A	-3.22462	High Fe.score
TCGA-EY-A72D-01A	0	TCGA-EY-A72D	179	87	Tumor	TCGA-UCEC	Stage II	G3			Post			NO	40.3902	Fe.cluster B	>64	>=24	Wildtype	Mutant	Mutant	Wildtype	Alive	Fe.Gene.cluster C	-3.71182	Low Fe.score
TCGA-B5-A11V-01A	0	TCGA-B5-A11V	595	64	Tumor	TCGA-UCEC	Stage I	G1	YES	YES	Post	0	Complete Remission/Response	NO	28.8044	Fe.cluster A	<=64	>=24	Mutant	Wildtype	Wildtype	Wildtype	Alive	Fe.Gene.cluster B	-6.08229	Low Fe.score
TCGA-EY-A2OP-01A	0	TCGA-EY-A2OP	944	63	Tumor	TCGA-UCEC	Stage I	G3	NO	NO	Post	2	Complete Remission/Response	NO	25.3333	Fe.cluster A	<=64	>=24	Mutant	Wildtype	Wildtype	Wildtype	Alive	Fe.Gene.cluster C	-2.26521	High Fe.score
TCGA-BS-A0TD-01A	0	TCGA-BS-A0TD	2379	65	Tumor	TCGA-UCEC	Stage I	G1	YES	YES	Post	2	Complete Remission/Response	NO	35.3798	Fe.cluster A	>64	>=24	Wildtype	Wildtype	Wildtype	Wildtype	Alive	Fe.Gene.cluster A	-4.66502	Low Fe.score
TCGA-B5-A11J-01A	0	TCGA-B5-A11J	1656	64	Tumor	TCGA-UCEC	Stage I	G2	YES	YES	Post	1	Complete Remission/Response	NO	NA	Fe.cluster A	<=64		Mutant	Mutant	Mutant	Wildtype	Alive	Fe.Gene.cluster B	-5.11895	Low Fe.score
TCGA-BG-A0MK-01A	1	TCGA-BG-A0MK	1317	52	Tumor	TCGA-UCEC	Stage II	G3			Pre		Progressive Disease	YES	NA	Fe.cluster D	<=64		Mutant	Wildtype	Mutant	Wildtype	Dead	Fe.Gene.cluster A	-7.10618	Low Fe.score
TCGA-D1-A17B-01A	0	TCGA-D1-A17B	213	69	Tumor	TCGA-UCEC	Stage I	G2	NO	YES	Post	3	Complete Remission/Response	NO	41.9143	Fe.cluster A	>64	>=24	Mutant	Wildtype	Wildtype	Wildtype	Alive	Fe.Gene.cluster B	-8.65469	Low Fe.score
TCGA-AX-A3G3-01A	0	TCGA-AX-A3G3	42	58	Tumor	TCGA-UCEC	Stage III	G3			Post				19.721	Fe.cluster C	<=64	normal	Mutant	Mutant	Wildtype	Wildtype	Alive	Fe.Gene.cluster C	-0.80844	High Fe.score
TCGA-FI-A2D0-01A	0	TCGA-FI-A2D0	1213	55	Tumor	TCGA-UCEC	Stage I	G3			Peri		Complete Remission/Response	NO	54.0779	Fe.cluster B	<=64	>=24	Wildtype	Wildtype	Wildtype	Mutant	Alive	Fe.Gene.cluster C	-4.83203	Low Fe.score
TCGA-BG-A0YU-01A	0	TCGA-BG-A0YU	451	37	Tumor	TCGA-UCEC	Stage I	G1	NO	NO	Pre		Complete Remission/Response	NO	43.4095	Fe.cluster B	<=64	>=24	Wildtype	Wildtype	Wildtype	Wildtype	Alive	Fe.Gene.cluster A	-4.85692	Low Fe.score
TCGA-AJ-A3EK-01A	0	TCGA-AJ-A3EK	446	53	Tumor	TCGA-UCEC	Stage I	G3	NO	NO	Peri	3	Complete Remission/Response	YES	24.3418	Fe.cluster D	<=64	>=24	Mutant	Mutant	Wildtype	Mutant	Alive	Fe.Gene.cluster C	-5.24501	Low Fe.score
TCGA-B5-A11F-01A	0	TCGA-B5-A11F	5651	55	Tumor	TCGA-UCEC	Stage I	G2	NO	NO	Post		Complete Remission/Response	YES	NA	Fe.cluster A	<=64		Mutant	Wildtype	Wildtype	Mutant	Alive	Fe.Gene.cluster B	-4.10359	Low Fe.score
TCGA-AX-A06L-01A	0	TCGA-AX-A06L	1845	63	Tumor	TCGA-UCEC	Stage I	G1			Post		Complete Remission/Response	NO	43.2082	Fe.cluster A	<=64	>=24	Mutant	Wildtype	Wildtype	Wildtype	Alive	Fe.Gene.cluster B	-6.77339	Low Fe.score
TCGA-EO-A3AY-01A	0	TCGA-EO-A3AY	1158	58	Tumor	TCGA-UCEC	Stage I	G3	NO	NO	Post	2	Complete Remission/Response	NO	28.257	Fe.cluster C	<=64	>=24	Mutant	Wildtype	Wildtype	Mutant	Alive	Fe.Gene.cluster C	-5.63601	Low Fe.score
TCGA-A5-A0GG-01A	0	TCGA-A5-A0GG	3762	76	Tumor	TCGA-UCEC	Stage I	G1	NO	YES	Post	4+	Complete Remission/Response	YES	25	Fe.cluster B	>64	>=24					Alive	Fe.Gene.cluster C	-1.92205	High Fe.score
TCGA-A5-A0GN-01A	0	TCGA-A5-A0GN	1841	65	Tumor	TCGA-UCEC	Stage I	G1	NO	YES	Post	2	Complete Remission/Response	YES	25.2826	Fe.cluster A	>64	>=24	Wildtype	Wildtype	Wildtype	Wildtype	Alive	Fe.Gene.cluster B	-5.72459	Low Fe.score
TCGA-BG-A220-01A	0	TCGA-BG-A220	434	69	Tumor	TCGA-UCEC	Stage I	G3	YES	YES		4+	Complete Remission/Response	YES	NA	Fe.cluster B	>64		Mutant	Wildtype	Mutant	Wildtype	Alive	Fe.Gene.cluster C	1.80848	High Fe.score
TCGA-D1-A1NY-01A	0	TCGA-D1-A1NY	513	67	Tumor	TCGA-UCEC	Stage I	G3	NO	YES	Post	2	Complete Remission/Response	YES	34.3679	Fe.cluster A	>64	>=24	Mutant	Wildtype	Wildtype	Wildtype	Alive	Fe.Gene.cluster C	-2.46988	High Fe.score
TCGA-AP-A059-01A	0	TCGA-AP-A059	1461	69	Tumor	TCGA-UCEC	Stage I	G3			Post			YES	38.6719	Fe.cluster A	>64	>=24	Mutant	Mutant	Wildtype	Mutant	Alive	Fe.Gene.cluster C	-8.06488	Low Fe.score
TCGA-FI-A2F8-01A	0	TCGA-FI-A2F8	933	64	Tumor	TCGA-UCEC	Stage II	G3	NO	YES	Post	2	Complete Remission/Response	NO	33.0783	Fe.cluster C	<=64	>=24	Wildtype	Mutant	Wildtype	Wildtype	Alive	Fe.Gene.cluster C	-0.5848	High Fe.score
TCGA-AX-A06H-01A	0	TCGA-AX-A06H	833	60	Tumor	TCGA-UCEC	Stage III	G1			Post	1	Complete Remission/Response	NO	38.2812	Fe.cluster A	<=64	>=24	Mutant	Wildtype	Wildtype	Wildtype	Alive	Fe.Gene.cluster B	-8.09223	Low Fe.score
TCGA-AP-A0L9-01A	0	TCGA-AP-A0L9	3815	71	Tumor	TCGA-UCEC	Stage I	G3			Post			NO	25.9695	Fe.cluster C	>64	>=24	Wildtype	Mutant	Wildtype	Wildtype	Alive	Fe.Gene.cluster C	2.71975	High Fe.score
TCGA-A5-A7WJ-01A	0	TCGA-A5-A7WJ	341	64	Tumor	TCGA-UCEC	Stage I	G2	NO	NO	Post	1	Complete Remission/Response	NO	22.1453	Fe.cluster B	<=64	normal	Mutant	Wildtype	Wildtype	Wildtype	Alive	Fe.Gene.cluster C	-3.16899	High Fe.score
TCGA-AX-A1CI-01A	0	TCGA-AX-A1CI	2600	61	Tumor	TCGA-UCEC	Stage I	G1			Post			NO	27.5134	Fe.cluster A	<=64	>=24	Wildtype	Wildtype	Wildtype	Wildtype	Alive	Fe.Gene.cluster B	-3.68787	Low Fe.score
TCGA-D1-A1NU-01A	0	TCGA-D1-A1NU	402	74	Tumor	TCGA-UCEC	Stage I	G3	NO	YES	Post	2	Complete Remission/Response	YES	40.7877	Fe.cluster C	>64	>=24	Wildtype	Mutant	Wildtype	Wildtype	Alive	Fe.Gene.cluster C	2.24202	High Fe.score
TCGA-H5-A2HR-01A	0	TCGA-H5-A2HR	53	71	Tumor	TCGA-UCEC	Stage I	G3	NO	NO	Post	4+			NA	Fe.cluster C	>64		Wildtype	Mutant	Wildtype	Wildtype	Alive	Fe.Gene.cluster C	2.49233	High Fe.score
TCGA-AX-A1CR-01A	0	TCGA-AX-A1CR	701	70	Tumor	TCGA-UCEC	Stage II	G3			Post			NO	35.629	Fe.cluster C	>64	>=24	Wildtype	Mutant	Wildtype	Wildtype	Alive	Fe.Gene.cluster C	0.807737	High Fe.score
TCGA-DI-A1NO-01A	1	TCGA-DI-A1NO	285	68	Tumor	TCGA-UCEC	Stage III	G3	YES	YES	Post	1	Complete Remission/Response	NO	44.2735	Fe.cluster B	>64	>=24	Wildtype	Mutant	Wildtype	Wildtype	Dead	Fe.Gene.cluster C	2.983	High Fe.score
TCGA-E6-A8L9-01A	0	TCGA-E6-A8L9	1013	61	Tumor	TCGA-UCEC	Stage I	G3	YES	NO	Post	4+	Complete Remission/Response	YES	29.7211	Fe.cluster C	<=64	>=24	Wildtype	Mutant	Wildtype	Wildtype	Alive	Fe.Gene.cluster C	-2.04534	High Fe.score
TCGA-A5-A0G9-01A	0	TCGA-A5-A0G9	2540	79	Tumor	TCGA-UCEC	Stage I	G3	NO	NO	Post	0	Complete Remission/Response	NO	27.7177	Fe.cluster D	>64	>=24	Mutant	Wildtype	Wildtype	Wildtype	Alive	Fe.Gene.cluster B	-1.62874	High Fe.score
TCGA-DF-A2KZ-01A	0	TCGA-DF-A2KZ	826	87	Tumor	TCGA-UCEC	Stage I	G3			Post				NA	Fe.cluster A	>64		Mutant	Wildtype	Mutant	Wildtype	Alive	Fe.Gene.cluster B	-5.77166	Low Fe.score
TCGA-BG-A2L7-01A	0	TCGA-BG-A2L7	612	68	Tumor	TCGA-UCEC	Stage I	G3					Complete Remission/Response	YES	NA	Fe.cluster B	>64		Mutant	Wildtype	Wildtype	Wildtype	Alive	Fe.Gene.cluster B	-4.03404	Low Fe.score
TCGA-B5-A1MZ-01A	0	TCGA-B5-A1MZ	1598	54	Tumor	TCGA-UCEC	Stage I	G1		NO	Indeterminate	1	Complete Remission/Response	YES	41.3703	Fe.cluster B	<=64	>=24	Mutant	Wildtype	Wildtype	Wildtype	Alive	Fe.Gene.cluster B	-5.9268	Low Fe.score
TCGA-B5-A1MR-01A	0	TCGA-B5-A1MR	6859	65	Tumor	TCGA-UCEC	Stage III	G3	NO	YES	Post	3	Complete Remission/Response	YES	NA	Fe.cluster C	>64		Mutant	Wildtype	Wildtype	Mutant	Alive	Fe.Gene.cluster C	-5.66732	Low Fe.score
TCGA-D1-A176-01A	0	TCGA-D1-A176	917	67	Tumor	TCGA-UCEC	Stage I	G2	NO	YES	Post	2	Complete Remission/Response	NO	33.705	Fe.cluster B	>64	>=24	Wildtype	Wildtype	Wildtype	Wildtype	Alive	Fe.Gene.cluster B	-6.60238	Low Fe.score
TCGA-B5-A1MU-01A	1	TCGA-B5-A1MU	1548	79	Tumor	TCGA-UCEC	Stage IV	G3	NO	NO	Post	3	Complete Remission/Response	NO	20.3619	Fe.cluster A	>64	normal	Wildtype	Mutant	Wildtype	Wildtype	Dead	Fe.Gene.cluster C	-1.53313	High Fe.score
TCGA-AX-A3G6-01A	0	TCGA-AX-A3G6	8	67	Tumor	TCGA-UCEC	Stage I	G2							21.5139	Fe.cluster A	>64	normal	Mutant	Mutant	Wildtype	Wildtype	Alive	Fe.Gene.cluster C	2.04471	High Fe.score
TCGA-BG-A0MG-01A	0	TCGA-BG-A0MG	1477	73	Tumor	TCGA-UCEC	Stage I	G1	NO	NO	Post	4+	Complete Remission/Response	NO	23.8281	Fe.cluster A	>64	normal	Mutant	Wildtype	Wildtype	Wildtype	Alive	Fe.Gene.cluster C	-1.09106	High Fe.score
TCGA-E6-A1LX-01A	0	TCGA-E6-A1LX	711	40	Tumor	TCGA-UCEC	Stage I	G3	NO	NO	Pre	1	Complete Remission/Response	YES	NA	Fe.cluster C	<=64		Mutant	Mutant	Mutant	Mutant	Alive	Fe.Gene.cluster C	-4.00753	Low Fe.score
TCGA-BS-A0WQ-01A	0	TCGA-BS-A0WQ	2022	55	Tumor	TCGA-UCEC	Stage I	G2	YES	YES	Post	0	Complete Remission/Response	NO	36.3281	Fe.cluster A	<=64	>=24	Mutant	Wildtype	Wildtype	Wildtype	Alive	Fe.Gene.cluster B	-4.10822	Low Fe.score
TCGA-A5-A1OK-01A	0	TCGA-A5-A1OK	917	63	Tumor	TCGA-UCEC	Stage III	G3	YES	YES	Post	0	Complete Remission/Response	YES	31.9559	Fe.cluster B	<=64	>=24	Wildtype	Wildtype	Wildtype	Wildtype	Alive	Fe.Gene.cluster A	-4.3361	Low Fe.score
TCGA-D1-A0ZR-01A	0	TCGA-D1-A0ZR	17	57	Tumor	TCGA-UCEC	Stage I	G2	YES	YES	Indeterminate	4+	Complete Remission/Response	NO	42.9752	Fe.cluster B	<=64	>=24	Mutant	Wildtype	Wildtype	Wildtype	Alive	Fe.Gene.cluster A	-4.22975	Low Fe.score
TCGA-K6-A3WQ-01A	1	TCGA-K6-A3WQ	427	60	Tumor	TCGA-UCEC	Stage IV	G3	YES	NO	Post	1		YES	33.8566	Fe.cluster C	<=64	>=24	Wildtype	Mutant	Wildtype	Wildtype	Dead	Fe.Gene.cluster C	3.79147	High Fe.score
TCGA-D1-A17L-01A	0	TCGA-D1-A17L	802	81	Tumor	TCGA-UCEC	Stage I	G1	NO	NO	Post	0	Complete Remission/Response	NO	41.5765	Fe.cluster A	>64	>=24	Mutant	Wildtype	Wildtype	Wildtype	Alive	Fe.Gene.cluster B	-8.16974	Low Fe.score
TCGA-D1-A3JQ-01A	0	TCGA-D1-A3JQ	526	61	Tumor	TCGA-UCEC	Stage III	G3	NO	YES	Post	4+	Complete Remission/Response	YES	46.6803	Fe.cluster C	<=64	>=24	Wildtype	Mutant	Wildtype	Wildtype	Alive	Fe.Gene.cluster C	2.24944	High Fe.score
TCGA-D1-A15V-01A	0	TCGA-D1-A15V	1201	68	Tumor	TCGA-UCEC	Stage I	G3	NO	NO	Post	0	Complete Remission/Response	YES	26.9531	Fe.cluster B	>64	>=24	Wildtype	Mutant	Wildtype	Wildtype	Alive	Fe.Gene.cluster C	-1.36019	High Fe.score
TCGA-D1-A1NX-01A	0	TCGA-D1-A1NX	555	66	Tumor	TCGA-UCEC	Stage III	G3	NO	YES	Post	2	Complete Remission/Response	YES	34.4132	Fe.cluster A	>64	>=24	Wildtype	Mutant	Wildtype	Wildtype	Alive	Fe.Gene.cluster C	3.11846	High Fe.score
TCGA-PG-A7D5-01A	0	TCGA-PG-A7D5	1177	62	Tumor	TCGA-UCEC	Stage I	G3	YES	YES	Post	4+	Stable Disease	YES	31.6456	Fe.cluster B	<=64	>=24	Wildtype	Mutant	Wildtype	Wildtype	Alive	Fe.Gene.cluster C	3.1327	High Fe.score
TCGA-AX-A063-01A	0	TCGA-AX-A063	2417	63	Tumor	TCGA-UCEC	Stage I	G2			Post			NO	34.375	Fe.cluster A	<=64	>=24	Mutant	Wildtype	Wildtype	Wildtype	Alive	Fe.Gene.cluster B	-5.95472	Low Fe.score
TCGA-EY-A54A-01A	0	TCGA-EY-A54A	447	67	Tumor	TCGA-UCEC	Stage III	G3			Post		Complete Remission/Response	YES	27.0051	Fe.cluster B	>64	>=24	Wildtype	Mutant	Wildtype	Wildtype	Alive	Fe.Gene.cluster C	0.712579	High Fe.score
TCGA-B5-A1MX-01A	0	TCGA-B5-A1MX	1473	47	Tumor	TCGA-UCEC	Stage I	G3		NO	Pre	4+	Complete Remission/Response	YES	25.1039	Fe.cluster C	<=64	>=24	Mutant	Mutant	Mutant	Mutant	Alive	Fe.Gene.cluster C	-7.42393	Low Fe.score
TCGA-FI-A2EX-01A	0	TCGA-FI-A2EX	284	58	Tumor	TCGA-UCEC	Stage III	G3	NO	NO	Post	2	Complete Remission/Response	NO	37.5274	Fe.cluster C	<=64	>=24	Wildtype	Mutant	Wildtype	Wildtype	Alive	Fe.Gene.cluster C	2.30592	High Fe.score
TCGA-AP-A1E4-01A	0	TCGA-AP-A1E4	1555	54	Tumor	TCGA-UCEC	Stage I	G2			Post			YES	20.3244	Fe.cluster A	<=64	normal	Wildtype	Wildtype	Mutant	Wildtype	Alive	Fe.Gene.cluster C	3.78951	High Fe.score
TCGA-A5-A2K3-01A	0	TCGA-A5-A2K3	2012	68	Tumor	TCGA-UCEC	Stage I	G3	NO	YES	Post	4+	Complete Remission/Response	NO	31.25	Fe.cluster A	>64	>=24	Wildtype	Mutant	Wildtype	Wildtype	Alive	Fe.Gene.cluster C	-9.70507	Low Fe.score
TCGA-AJ-A3NF-01A	0	TCGA-AJ-A3NF	645	60	Tumor	TCGA-UCEC	Stage III	G3	NO	YES	Post	3	Complete Remission/Response	YES	45.7031	Fe.cluster C	<=64	>=24	Wildtype	Mutant	Wildtype	Wildtype	Alive	Fe.Gene.cluster C	0.389749	High Fe.score
TCGA-BK-A0CA-01A	0	TCGA-BK-A0CA	1064	61	Tumor	TCGA-UCEC	Stage III	G3			Post			NO	NA	Fe.cluster B	<=64		Mutant	Wildtype	Wildtype	Wildtype	Alive	Fe.Gene.cluster A	-3.37683	Low Fe.score
TCGA-BS-A0UA-01A	0	TCGA-BS-A0UA	3495	68	Tumor	TCGA-UCEC	Stage I	G1	NO	YES	Post	1	Complete Remission/Response	NO	27.7008	Fe.cluster A	>64	>=24	Wildtype	Wildtype	Wildtype	Mutant	Alive	Fe.Gene.cluster A	-8.14062	Low Fe.score
TCGA-D1-A1O0-01A	0	TCGA-D1-A1O0	63	77	Tumor	TCGA-UCEC	Stage I	G3	YES	YES	Post	0	Complete Remission/Response	NO	47.4664	Fe.cluster B	>64	>=24	Wildtype	Mutant	Wildtype	Wildtype	Alive	Fe.Gene.cluster C	0.363682	High Fe.score
TCGA-EO-A2CG-01A	0	TCGA-EO-A2CG	1564	69	Tumor	TCGA-UCEC	Stage I	G3	NO	YES	Post	4+	Complete Remission/Response	YES	29.4321	Fe.cluster A	>64	>=24	Wildtype	Mutant	Wildtype	Wildtype	Alive	Fe.Gene.cluster C	0.642299	High Fe.score
TCGA-EY-A1GU-01A	1	TCGA-EY-A1GU	997	66	Tumor	TCGA-UCEC	Stage I	G2			Post			YES	35.1562	Fe.cluster B	>64	>=24	Mutant	Wildtype	Mutant	Mutant	Dead	Fe.Gene.cluster B	-3.82023	Low Fe.score
TCGA-DF-A2KS-01A	0	TCGA-DF-A2KS	3318	69	Tumor	TCGA-UCEC	Stage I	G3	NO	YES	Post	4+	Complete Remission/Response	YES	NA	Fe.cluster C	>64		Mutant	Mutant	Wildtype	Wildtype	Alive	Fe.Gene.cluster C	-5.57507	Low Fe.score
TCGA-AJ-A3BG-01A	0	TCGA-AJ-A3BG	550	65	Tumor	TCGA-UCEC	Stage I	G3	NO	NO	Post		Complete Remission/Response	YES	24.841	Fe.cluster D	>64	>=24	Mutant	Mutant	Wildtype	Wildtype	Alive	Fe.Gene.cluster C	-3.32015	Low Fe.score
TCGA-A5-A0VQ-01A	0	TCGA-A5-A0VQ	485	62	Tumor	TCGA-UCEC	Stage I	G3	NO	YES	Post	4+	Complete Remission/Response	YES	35.6513	Fe.cluster A	<=64	>=24	Mutant	Wildtype	Wildtype	Wildtype	Alive	Fe.Gene.cluster B	-4.49543	Low Fe.score
TCGA-B5-A3FA-01A	0	TCGA-B5-A3FA	2929	73	Tumor	TCGA-UCEC	Stage I	G3		YES	Post	4+		NO	29.6427	Fe.cluster A	>64	>=24	Mutant	Mutant	Mutant	Mutant	Alive	Fe.Gene.cluster C	-0.64329	High Fe.score
TCGA-B5-A11H-01A	0	TCGA-B5-A11H	2687	67	Tumor	TCGA-UCEC	Stage III	G2	YES	YES	Post		Complete Remission/Response	NO	NA	Fe.cluster C	>64		Mutant	Wildtype	Wildtype	Wildtype	Alive	Fe.Gene.cluster B	-4.41694	Low Fe.score
TCGA-AP-A1E3-01A	0	TCGA-AP-A1E3	847	45	Tumor	TCGA-UCEC	Stage III	G3	NO	YES	Pre	0	Partial Remission/Response	NO	48.9292	Fe.cluster C	<=64	>=24	Mutant	Wildtype	Mutant	Wildtype	Alive	Fe.Gene.cluster B	-5.16818	Low Fe.score
TCGA-D1-A17C-01A	0	TCGA-D1-A17C	30	78	Tumor	TCGA-UCEC	Stage I	G1	NO	NO	Post	3	Complete Remission/Response	NO	31.2488	Fe.cluster A	>64	>=24	Mutant	Wildtype	Wildtype	Wildtype	Alive	Fe.Gene.cluster B	-7.30691	Low Fe.score
TCGA-B5-A0K8-01A	0	TCGA-B5-A0K8	847	71	Tumor	TCGA-UCEC	Stage I	G3			Post	4+	Complete Remission/Response	NO	23.8281	Fe.cluster A	>64	normal	Wildtype	Mutant	Wildtype	Wildtype	Alive	Fe.Gene.cluster C	-2.07678	High Fe.score
TCGA-A5-A0GJ-01A	0	TCGA-A5-A0GJ	2000	44	Tumor	TCGA-UCEC	Stage I	G2	NO	YES	Post	1	Complete Remission/Response	NO	43.2835	Fe.cluster A	<=64	>=24	Wildtype	Mutant	Wildtype	Wildtype	Alive	Fe.Gene.cluster C	-4.90613	Low Fe.score
TCGA-AX-A2HK-01A	1	TCGA-AX-A2HK	90	77	Tumor	TCGA-UCEC	Stage III	G3		YES	Post	4+	Complete Remission/Response	NO	30.7809	Fe.cluster B	>64	>=24	Wildtype	Mutant	Wildtype	Wildtype	Dead	Fe.Gene.cluster C	5.60213	High Fe.score
TCGA-AP-A1DH-01A	0	TCGA-AP-A1DH	2180	62	Tumor	TCGA-UCEC	Stage I	G3	NO	YES	Post	3	Complete Remission/Response	YES	44.9972	Fe.cluster C	<=64	>=24	Mutant	Wildtype	Mutant	Wildtype	Alive	Fe.Gene.cluster C	-5.26518	Low Fe.score
TCGA-AX-A1CA-01A	0	TCGA-AX-A1CA	974	70	Tumor	TCGA-UCEC	Stage I	G3						NO	31.2386	Fe.cluster C	>64	>=24	Wildtype	Mutant	Wildtype	Wildtype	Alive	Fe.Gene.cluster C	-1.84463	High Fe.score
TCGA-PG-A917-01A	0	TCGA-PG-A917	212	74	Tumor	TCGA-UCEC	Stage I	G2	NO	YES	Post	2	Complete Remission/Response	NO	NA	Fe.cluster A	>64		Wildtype	Wildtype	Wildtype	Wildtype	Alive	Fe.Gene.cluster B	-6.96735	Low Fe.score
TCGA-BK-A0CB-01A	0	TCGA-BK-A0CB	1092	60	Tumor	TCGA-UCEC	Stage III	G2	YES	YES	Post	0	Complete Remission/Response	NO	46.8038	Fe.cluster A	<=64	>=24	Mutant	Wildtype	Wildtype	Wildtype	Alive	Fe.Gene.cluster B	-6.15213	Low Fe.score
TCGA-BG-A221-01A	0	TCGA-BG-A221	55	84	Tumor	TCGA-UCEC	Stage I	G3	NO	YES	Post	4+	Complete Remission/Response	NO	25.1532	Fe.cluster C	>64	>=24	Mutant	Wildtype	Wildtype	Wildtype	Alive	Fe.Gene.cluster C	-2.82461	High Fe.score
TCGA-KP-A3W3-01A	0	TCGA-KP-A3W3	794	72	Tumor	TCGA-UCEC	Stage I	G3			Post				46.8471	Fe.cluster C	>64	>=24	Wildtype	Mutant	Wildtype	Wildtype	Alive	Fe.Gene.cluster C	1.50246	High Fe.score
TCGA-BG-A0MH-01A	0	TCGA-BG-A0MH	1930	61	Tumor	TCGA-UCEC	Stage I	G2			Post		Complete Remission/Response	YES	57.3453	Fe.cluster A	<=64	>=24					Alive	Fe.Gene.cluster C	-9.25524	Low Fe.score
TCGA-FI-A2D5-01A	1	TCGA-FI-A2D5	421	56	Tumor	TCGA-UCEC	Stage IV	G3	NO	NO	Post	1	Partial Remission/Response	NO	35.9375	Fe.cluster C	<=64	>=24	Mutant	Wildtype	Mutant	Mutant	Dead	Fe.Gene.cluster C	1.97686	High Fe.score
TCGA-AX-A1CC-01A	0	TCGA-AX-A1CC	788	65	Tumor	TCGA-UCEC	Stage I	G3			Post			NO	40.6805	Fe.cluster B	>64	>=24	Wildtype	Mutant	Wildtype	Wildtype	Alive	Fe.Gene.cluster C	-2.02502	High Fe.score
TCGA-B5-A1MS-01B	1	TCGA-B5-A1MS	3112	60	Tumor	TCGA-UCEC	Stage I	G3	NO	YES	Post	4+	Partial Remission/Response	NO	26.8544	Fe.cluster B	<=64	>=24	Wildtype	Mutant	Wildtype	Wildtype	Dead	Fe.Gene.cluster C	1.62083	High Fe.score
TCGA-BG-A187-01A	0	TCGA-BG-A187	448	65	Tumor	TCGA-UCEC	Stage I	G2	NO	YES		0	Complete Remission/Response	YES	23.8281	Fe.cluster A	>64	normal	Mutant	Wildtype	Mutant	Wildtype	Alive	Fe.Gene.cluster B	-6.9242	Low Fe.score
TCGA-D1-A17N-01A	0	TCGA-D1-A17N	46	46	Tumor	TCGA-UCEC	Stage I	G2	NO	NO	Peri	1	Complete Remission/Response	NO	48.6283	Fe.cluster A	<=64	>=24	Mutant	Wildtype	Wildtype	Wildtype	Alive	Fe.Gene.cluster B	-10.5152	Low Fe.score
TCGA-B5-A11Y-01A	0	TCGA-B5-A11Y	560	59	Tumor	TCGA-UCEC	Stage I	G1			Post	1	Complete Remission/Response	NO	24.0055	Fe.cluster A	<=64	>=24	Mutant	Wildtype	Wildtype	Wildtype	Alive	Fe.Gene.cluster B	-8.27197	Low Fe.score
TCGA-AX-A05W-01A	0	TCGA-AX-A05W	2450	60	Tumor	TCGA-UCEC	Stage II	G1			Post			NO	28.5483	Fe.cluster D	<=64	>=24	Mutant	Wildtype	Mutant	Wildtype	Alive	Fe.Gene.cluster A	-5.60333	Low Fe.score
TCGA-EY-A1H0-01A	0	TCGA-EY-A1H0	588	57	Tumor	TCGA-UCEC	Stage III	G2	YES	YES	Post	1	Partial Remission/Response	YES	33.8741	Fe.cluster D	<=64	>=24	Mutant	Wildtype	Mutant	Wildtype	Alive	Fe.Gene.cluster A	-4.54087	Low Fe.score
TCGA-D1-A1O5-01A	0	TCGA-D1-A1O5	458	61	Tumor	TCGA-UCEC	Stage I	G1	NO	NO	Post	3	Complete Remission/Response	NO	30.863	Fe.cluster B	<=64	>=24	Mutant	Wildtype	Wildtype	Wildtype	Alive	Fe.Gene.cluster B	-5.30576	Low Fe.score
TCGA-D1-A1NS-01A	0	TCGA-D1-A1NS	43	53	Tumor	TCGA-UCEC	Stage I	G1	NO	NO	Post	3	Complete Remission/Response	NO	39.7677	Fe.cluster A	<=64	>=24	Mutant	Wildtype	Mutant	Wildtype	Alive	Fe.Gene.cluster A	-5.82274	Low Fe.score
TCGA-D1-A16I-01A	1	TCGA-D1-A16I	350	62	Tumor	TCGA-UCEC	Stage I	High Grade	NO	YES	Post	2	Complete Remission/Response	YES	31.6158	Fe.cluster C	<=64	>=24	Wildtype	Mutant	Wildtype	Wildtype	Dead	Fe.Gene.cluster C	2.17757	High Fe.score
TCGA-AX-A3FZ-01A	0	TCGA-AX-A3FZ	6	33	Tumor	TCGA-UCEC	Stage III	G3							48.9093	Fe.cluster C	<=64	>=24	Mutant	Mutant	Wildtype	Wildtype	Alive	Fe.Gene.cluster C	1.14847	High Fe.score
TCGA-AX-A3GI-01A	0	TCGA-AX-A3GI	12	66	Tumor	TCGA-UCEC	Stage III	G3							31.1951	Fe.cluster B	>64	>=24	Wildtype	Mutant	Wildtype	Wildtype	Alive	Fe.Gene.cluster C	4.95918	High Fe.score
TCGA-D1-A179-01A	1	TCGA-D1-A179	448	76	Tumor	TCGA-UCEC	Stage III	High Grade	YES	YES	Post	4+	Complete Remission/Response	NO	36.1987	Fe.cluster C	>64	>=24					Dead	Fe.Gene.cluster C	3.41847	High Fe.score
TCGA-EY-A1G8-01A	1	TCGA-EY-A1G8	456	83	Tumor	TCGA-UCEC	Stage I	G3	NO	YES	Post	2	Complete Remission/Response	NO	19.1406	Fe.cluster A	>64	normal	Mutant	Mutant	Mutant	Mutant	Dead	Fe.Gene.cluster C	-0.04603	High Fe.score
TCGA-EY-A1GI-01A	0	TCGA-EY-A1GI	710	52	Tumor	TCGA-UCEC	Stage I	G2	NO	NO	Pre	2	Complete Remission/Response	YES	25.3443	Fe.cluster B	<=64	>=24	Mutant	Wildtype	Mutant	Mutant	Alive	Fe.Gene.cluster B	-3.078	High Fe.score
TCGA-A5-A0G2-01A	0	TCGA-A5-A0G2	4549	57	Tumor	TCGA-UCEC	Stage III	G3	NO	NO	Post	4+	Complete Remission/Response	YES	25.9695	Fe.cluster B	<=64	>=24	Mutant	Mutant	Mutant	Mutant	Alive	Fe.Gene.cluster C	-3.83619	Low Fe.score
TCGA-D1-A101-01A	0	TCGA-D1-A101	53	60	Tumor	TCGA-UCEC	Stage I	G2	YES	YES	Post	2	Complete Remission/Response	NO	36.4444	Fe.cluster A	<=64	>=24	Mutant	Wildtype	Mutant	Wildtype	Alive	Fe.Gene.cluster B	-7.6697	Low Fe.score
TCGA-D1-A17S-01A	0	TCGA-D1-A17S	739	59	Tumor	TCGA-UCEC	Stage I	G1	NO	NO	Post	2	Complete Remission/Response	NO	42.5781	Fe.cluster A	<=64	>=24	Mutant	Wildtype	Wildtype	Wildtype	Alive	Fe.Gene.cluster A	-5.44781	Low Fe.score
TCGA-AJ-A3NC-01A	0	TCGA-AJ-A3NC	1125	63	Tumor	TCGA-UCEC	Stage I	G3	YES	YES	Post		Complete Remission/Response	NO	38.9739	Fe.cluster A	<=64	>=24					Alive	Fe.Gene.cluster B	-4.76392	Low Fe.score
TCGA-E6-A2P8-01A	1	TCGA-E6-A2P8	72	53	Tumor	TCGA-UCEC	Stage IV	G3	NO	NO	Post	2	Progressive Disease	NO	31.2294	Fe.cluster B	<=64	>=24	Mutant	Wildtype	Wildtype	Wildtype	Dead	Fe.Gene.cluster C	-3.07772	High Fe.score
TCGA-AX-A3FW-01A	0	TCGA-AX-A3FW	17	66	Tumor	TCGA-UCEC	Stage I	G3			Post				30.1194	Fe.cluster A	>64	>=24	Mutant	Mutant	Wildtype	Wildtype	Alive	Fe.Gene.cluster A	0.485269	High Fe.score
TCGA-KP-A3W0-01A	0	TCGA-KP-A3W0	404	72	Tumor	TCGA-UCEC	Stage I	G3			Post				35.8177	Fe.cluster B	>64	>=24	Wildtype	Mutant	Wildtype	Wildtype	Alive	Fe.Gene.cluster C	1.92817	High Fe.score
TCGA-B5-A11M-01A	0	TCGA-B5-A11M	1362	43	Tumor	TCGA-UCEC	Stage I	G1	YES	YES	Pre	0	Complete Remission/Response	NO	59.3789	Fe.cluster B	<=64	>=24	Mutant	Wildtype	Mutant	Wildtype	Alive	Fe.Gene.cluster A	-6.29382	Low Fe.score
TCGA-E6-A1M0-01A	0	TCGA-E6-A1M0	1793	56	Tumor	TCGA-UCEC	Stage III	G3	NO	NO	Post	3	Complete Remission/Response	NO	37.6536	Fe.cluster B	<=64	>=24	Mutant	Wildtype	Wildtype	Mutant	Alive	Fe.Gene.cluster C	-1.84125	High Fe.score
TCGA-AX-A2HA-01A	0	TCGA-AX-A2HA	2475	35	Tumor	TCGA-UCEC	Stage I	G3	NO				Complete Remission/Response	NO	21.5139	Fe.cluster C	<=64	normal	Mutant	Wildtype	Mutant	Mutant	Alive	Fe.Gene.cluster B	-5.86928	Low Fe.score
TCGA-AX-A2IN-01A	1	TCGA-AX-A2IN	947	63	Tumor	TCGA-UCEC	Stage I	G3			Post			YES	40.5696	Fe.cluster C	<=64	>=24	Mutant	Mutant	Wildtype	Wildtype	Dead	Fe.Gene.cluster C	-3.07594	High Fe.score
TCGA-D1-A0ZO-01A	0	TCGA-D1-A0ZO	602	75	Tumor	TCGA-UCEC	Stage I	G1	NO	YES	Post	3	Complete Remission/Response	NO	40.404	Fe.cluster A	>64	>=24	Mutant	Wildtype	Wildtype	Mutant	Alive	Fe.Gene.cluster A	-7.52488	Low Fe.score
TCGA-D1-A16S-01A	0	TCGA-D1-A16S	568	70	Tumor	TCGA-UCEC	Stage III	High Grade	NO	NO	Post	2	Complete Remission/Response	NO	22.4813	Fe.cluster A	>64	normal	Wildtype	Mutant	Wildtype	Wildtype	Alive	Fe.Gene.cluster C	-0.25016	High Fe.score
TCGA-AP-A051-01A	0	TCGA-AP-A051	3948	69	Tumor	TCGA-UCEC	Stage I	G3			Post			YES	38.3687	Fe.cluster C	>64	>=24	Wildtype	Wildtype	Mutant	Mutant	Alive	Fe.Gene.cluster C	-4.25272	Low Fe.score
TCGA-D1-A2G6-01A	1	TCGA-D1-A2G6	258	53	Tumor	TCGA-UCEC	Stage III	G3			Post				28.3447	Fe.cluster D	<=64	>=24	Mutant	Wildtype	Wildtype	Wildtype	Dead	Fe.Gene.cluster C	-1.5309	High Fe.score
TCGA-AJ-A3OK-01A	0	TCGA-AJ-A3OK	485	73	Tumor	TCGA-UCEC	Stage I	G3			Post	2	Complete Remission/Response	YES	29.2969	Fe.cluster A	>64	>=24	Mutant	Wildtype	Wildtype	Wildtype	Alive	Fe.Gene.cluster A	-6.71901	Low Fe.score
TCGA-D1-A17K-01A	0	TCGA-D1-A17K	854	74	Tumor	TCGA-UCEC	Stage I	G2	NO	NO	Post	2	Complete Remission/Response	NO	37.4214	Fe.cluster A	>64	>=24	Wildtype	Mutant	Wildtype	Wildtype	Alive	Fe.Gene.cluster C	-0.98762	High Fe.score
TCGA-D1-A3DH-01A	0	TCGA-D1-A3DH	573	71	Tumor	TCGA-UCEC	Stage I	G3	YES	YES	Post	4+	Complete Remission/Response	YES	26.9274	Fe.cluster B	>64	>=24	Wildtype	Mutant	Wildtype	Wildtype	Alive	Fe.Gene.cluster C	6.67488	High Fe.score
TCGA-BG-A0MO-01A	0	TCGA-BG-A0MO	1309	63	Tumor	TCGA-UCEC	Stage I	G1	NO	NO	Post		Complete Remission/Response	YES	32.4219	Fe.cluster A	<=64	>=24	Wildtype	Wildtype	Wildtype	Wildtype	Alive	Fe.Gene.cluster B	-7.47412	Low Fe.score
TCGA-D1-A1O7-01A	0	TCGA-D1-A1O7	32	60	Tumor	TCGA-UCEC	Stage I	G1	YES	YES	Post	2	Complete Remission/Response	NO	43.8276	Fe.cluster D	<=64	>=24	Mutant	Wildtype	Wildtype	Wildtype	Alive	Fe.Gene.cluster A	-5.90974	Low Fe.score
TCGA-B5-A0JV-01A	0	TCGA-B5-A0JV	2616	63	Tumor	TCGA-UCEC	Stage I	G2		YES	Post	2	Complete Remission/Response	YES	34.1123	Fe.cluster B	<=64	>=24	Mutant	Wildtype	Mutant	Wildtype	Alive	Fe.Gene.cluster B	-3.1536	High Fe.score
TCGA-AX-A064-01A	0	TCGA-AX-A064	1517	81	Tumor	TCGA-UCEC	Stage II	G2			Post			NO	20.2395	Fe.cluster A	>64	normal	Mutant	Wildtype	Wildtype	Wildtype	Alive	Fe.Gene.cluster C	-2.95638	High Fe.score
TCGA-AX-A1CN-01A	0	TCGA-AX-A1CN	1143	54	Tumor	TCGA-UCEC	Stage II	G3			Pre			YES	47.6735	Fe.cluster B	<=64	>=24	Wildtype	Wildtype	Wildtype	Mutant	Alive	Fe.Gene.cluster C	-0.97065	High Fe.score
TCGA-B5-A0K4-01A	0	TCGA-B5-A0K4	1757	51	Tumor	TCGA-UCEC	Stage I	G2		YES	Post	0	Complete Remission/Response	YES	28.578	Fe.cluster D	<=64	>=24	Mutant	Wildtype	Wildtype	Wildtype	Alive	Fe.Gene.cluster C	-2.6523	High Fe.score
TCGA-FI-A2EY-01A	1	TCGA-FI-A2EY	880	63	Tumor	TCGA-UCEC	Stage III	G3	NO	YES	Post	3	Complete Remission/Response	NO	28.6661	Fe.cluster C	<=64	>=24	Wildtype	Mutant	Wildtype	Wildtype	Dead	Fe.Gene.cluster C	0.591347	High Fe.score
TCGA-D1-A0ZV-01A	0	TCGA-D1-A0ZV	728	58	Tumor	TCGA-UCEC	Stage I	G2	NO	NO	Post	2	Complete Remission/Response	NO	26.6436	Fe.cluster A	<=64	>=24	Mutant	Wildtype	Wildtype	Wildtype	Alive	Fe.Gene.cluster A	-6.29887	Low Fe.score
TCGA-AX-A06D-01A	1	TCGA-AX-A06D	373	82	Tumor	TCGA-UCEC	Stage III	G2	YES	YES	Post		Progressive Disease	NO	35.5469	Fe.cluster A	>64	>=24					Dead	Fe.Gene.cluster C	-2.36226	High Fe.score
TCGA-AP-A05P-01A	0	TCGA-AP-A05P	636	54	Tumor	TCGA-UCEC	Stage I	G1			Pre			NO	28.5483	Fe.cluster B	<=64	>=24	Mutant	Wildtype	Mutant	Wildtype	Alive	Fe.Gene.cluster B	-2.63933	High Fe.score
TCGA-EY-A214-01A	0	TCGA-EY-A214	438	66	Tumor	TCGA-UCEC	Stage III	G3	NO	YES	Post	2	Complete Remission/Response	YES	34.5271	Fe.cluster B	>64	>=24	Wildtype	Mutant	Mutant	Wildtype	Alive	Fe.Gene.cluster C	-5.46183	Low Fe.score
TCGA-A5-A0GW-01A	0	TCGA-A5-A0GW	706	46	Tumor	TCGA-UCEC	Stage I	G3	YES	YES	Post	0	Complete Remission/Response	YES	24.3007	Fe.cluster D	<=64	>=24	Mutant	Mutant	Wildtype	Wildtype	Alive	Fe.Gene.cluster C	-6.50174	Low Fe.score
TCGA-EY-A3QX-01A	1	TCGA-EY-A3QX	989	64	Tumor	TCGA-UCEC	Stage IV	G3	NO	YES	Post	4+	Complete Remission/Response	NO	22.3214	Fe.cluster C	<=64	normal	Wildtype	Mutant	Wildtype	Wildtype	Dead	Fe.Gene.cluster C	-1.91641	High Fe.score
TCGA-EO-A3L0-01A	0	TCGA-EO-A3L0	1554	76	Tumor	TCGA-UCEC	Stage I	G3	NO	NO	Post	2	Complete Remission/Response	YES	43.5109	Fe.cluster B	>64	>=24	Mutant	Mutant	Wildtype	Wildtype	Alive	Fe.Gene.cluster C	0.712006	High Fe.score
TCGA-B5-A5OC-01A	0	TCGA-B5-A5OC	1249	71	Tumor	TCGA-UCEC	Stage III	G3	YES	YES		3		YES	NA	Fe.cluster A	>64		Mutant	Wildtype	Mutant	Wildtype	Alive	Fe.Gene.cluster B	-6.94038	Low Fe.score
TCGA-EO-A2CH-01A	1	TCGA-EO-A2CH	590	73	Tumor	TCGA-UCEC	Stage IV	G3	YES	YES	Post	1	Progressive Disease	NO	28.5665	Fe.cluster C	>64	>=24	Wildtype	Mutant	Wildtype	Wildtype	Dead	Fe.Gene.cluster C	2.75311	High Fe.score
TCGA-A5-A0GP-01A	0	TCGA-A5-A0GP	1416	58	Tumor	TCGA-UCEC	Stage I	G1	NO	NO	Post	2	Complete Remission/Response	NO	23.4375	Fe.cluster D	<=64	normal	Mutant	Wildtype	Mutant	Mutant	Alive	Fe.Gene.cluster C	-2.27398	High Fe.score
TCGA-EO-A22Y-01A	0	TCGA-EO-A22Y	1567	68	Tumor	TCGA-UCEC	Stage I	G3	NO	YES	Post	2	Complete Remission/Response	YES	NA	Fe.cluster B	>64		Mutant	Wildtype	Wildtype	Wildtype	Alive	Fe.Gene.cluster A	-0.47214	High Fe.score
TCGA-AX-A05Z-01A	0	TCGA-AX-A05Z	2175	37	Tumor	TCGA-UCEC	Stage III	G2			Indeterminate			NO	29.3333	Fe.cluster C	<=64	>=24	Mutant	Wildtype	Wildtype	Mutant	Alive	Fe.Gene.cluster B	-10.7674	Low Fe.score
TCGA-B5-A11I-01A	0	TCGA-B5-A11I	2303	65	Tumor	TCGA-UCEC	Stage IV	G3	YES	YES	Post	0	Complete Remission/Response	YES	49.0487	Fe.cluster A	>64	>=24	Wildtype	Mutant	Wildtype	Wildtype	Alive	Fe.Gene.cluster C	-1.2264	High Fe.score
TCGA-EO-A22U-01A	0	TCGA-EO-A22U	1407	83	Tumor	TCGA-UCEC	Stage I	G3	NO	NO	Post	0	Complete Remission/Response	YES	26.2222	Fe.cluster C	>64	>=24	Mutant	Wildtype	Mutant	Mutant	Alive	Fe.Gene.cluster C	-3.4334	Low Fe.score
TCGA-BS-A0TC-01A	0	TCGA-BS-A0TC	2602	69	Tumor	TCGA-UCEC	Stage I	G1	YES	YES	Post	4+	Complete Remission/Response	NO	31.4684	Fe.cluster B	>64	>=24	Wildtype	Wildtype	Mutant	Wildtype	Alive	Fe.Gene.cluster A	-5.81013	Low Fe.score
TCGA-B5-A0K9-01A	1	TCGA-B5-A0K9	409	88	Tumor	TCGA-UCEC	Stage II	G1			Post		Complete Remission/Response	YES	25.3906	Fe.cluster A	>64	>=24	Mutant	Wildtype	Wildtype	Wildtype	Dead	Fe.Gene.cluster C	-6.09681	Low Fe.score
TCGA-AX-A3G1-01A	1	TCGA-AX-A3G1	624	84	Tumor	TCGA-UCEC	Stage I	G3			Post	4+		NO	23.8281	Fe.cluster B	>64	normal	Wildtype	Mutant	Wildtype	Wildtype	Dead	Fe.Gene.cluster C	-1.64464	High Fe.score
TCGA-D1-A16G-01A	1	TCGA-D1-A16G	834	74	Tumor	TCGA-UCEC	Stage IV	High Grade	NO	NO	Post	3	Complete Remission/Response	YES	25.0593	Fe.cluster A	>64	>=24	Wildtype	Mutant	Wildtype	Wildtype	Dead	Fe.Gene.cluster C	-5.46699	Low Fe.score
TCGA-AP-A0LN-01A	0	TCGA-AP-A0LN	2510	56	Tumor	TCGA-UCEC	Stage I	G1			Post			NO	43.1848	Fe.cluster A	<=64	>=24	Mutant	Wildtype	Wildtype	Wildtype	Alive	Fe.Gene.cluster B	-5.62396	Low Fe.score
TCGA-EO-A22X-01A	0	TCGA-EO-A22X	1752	36	Tumor	TCGA-UCEC	Stage III	G3	NO	NO	Pre		Complete Remission/Response	NO	24.2382	Fe.cluster A	<=64	>=24	Mutant	Wildtype	Mutant	Mutant	Alive	Fe.Gene.cluster C	-2.3704	High Fe.score
TCGA-JU-AAVI-01A	1	TCGA-JU-AAVI	540	61	Tumor	TCGA-UCEC	Stage III	G3	NO	YES	Post	1	Complete Remission/Response	YES	53.7778	Fe.cluster C	<=64	>=24	Wildtype	Mutant	Mutant	Wildtype	Dead	Fe.Gene.cluster C	-5.38132	Low Fe.score
TCGA-AJ-A3NH-01A	1	TCGA-AJ-A3NH	1	90	Tumor	TCGA-UCEC	Stage I	G3	NO	YES	Post	3	Complete Remission/Response	NO	24.7676	Fe.cluster C	>64	>=24					Dead	Fe.Gene.cluster C	5.59786	High Fe.score
TCGA-A5-A3LO-01A	0	TCGA-A5-A3LO	776	64	Tumor	TCGA-UCEC	Stage I	G3	NO	NO	Post	2	Complete Remission/Response	NO	36.4938	Fe.cluster C	<=64	>=24	Mutant	Mutant	Mutant	Wildtype	Alive	Fe.Gene.cluster C	-3.83071	Low Fe.score
TCGA-BG-A3EW-01A	0	TCGA-BG-A3EW	344	62	Tumor	TCGA-UCEC	Stage III	G3			Post		Complete Remission/Response	YES	45.7251	Fe.cluster B	<=64	>=24	Mutant	Wildtype	Wildtype	Wildtype	Alive	Fe.Gene.cluster C	2.74736	High Fe.score
TCGA-D1-A3DG-01A	1	TCGA-D1-A3DG	130	81	Tumor	TCGA-UCEC	Stage IV	G3	NO	NO	Post	3		NO	30.4705	Fe.cluster B	>64	>=24	Wildtype	Wildtype	Wildtype	Wildtype	Dead	Fe.Gene.cluster C	0.085348	High Fe.score
TCGA-AX-A2H4-01A	1	TCGA-AX-A2H4	916	66	Tumor	TCGA-UCEC	Stage III	G3	YES	YES	Post		Complete Remission/Response	NO	34.0785	Fe.cluster C	>64	>=24	Wildtype	Mutant	Wildtype	Wildtype	Dead	Fe.Gene.cluster C	-2.01157	High Fe.score
TCGA-AJ-A3TW-01A	0	TCGA-AJ-A3TW	513	78	Tumor	TCGA-UCEC	Stage I	G3	NO	YES	Post	3	Complete Remission/Response	YES	21.4844	Fe.cluster C	>64	normal	Wildtype	Mutant	Wildtype	Wildtype	Alive	Fe.Gene.cluster C	-1.34442	High Fe.score
TCGA-AP-A3K1-01A	1	TCGA-AP-A3K1	666	56	Tumor	TCGA-UCEC	Stage IV	High Grade	NO	NO	Post	0	Progressive Disease	NO	24.3418	Fe.cluster C	<=64	>=24					Dead	Fe.Gene.cluster C	-0.26481	High Fe.score
TCGA-AX-A3GB-01A	0	TCGA-AX-A3GB	440	73	Tumor	TCGA-UCEC	Stage I	G3		YES	Post			NO	34.8502	Fe.cluster A	>64	>=24	Mutant	Wildtype	Mutant	Wildtype	Alive	Fe.Gene.cluster A	-7.54769	Low Fe.score
TCGA-FI-A3PX-01A	0	TCGA-FI-A3PX	2384	57	Tumor	TCGA-UCEC	Stage III	High Grade			Post		Complete Remission/Response	NO	31.1419	Fe.cluster C	<=64	>=24	Wildtype	Mutant	Wildtype	Wildtype	Alive	Fe.Gene.cluster C	4.72741	High Fe.score
TCGA-QF-A5YS-01A	0	TCGA-QF-A5YS	689	57	Tumor	TCGA-UCEC	Stage II	G2	NO	YES	Post	2	Complete Remission/Response	YES	30.1021	Fe.cluster A	<=64	>=24	Mutant	Wildtype	Wildtype	Mutant	Alive	Fe.Gene.cluster B	-4.85081	Low Fe.score
TCGA-D1-A168-01A	0	TCGA-D1-A168	1098	67	Tumor	TCGA-UCEC	Stage I	G3	NO	YES	Post	3	Complete Remission/Response	YES	28.959	Fe.cluster A	>64	>=24	Wildtype	Wildtype	Mutant	Wildtype	Alive	Fe.Gene.cluster C	-3.68582	Low Fe.score
TCGA-FI-A2CX-01A	0	TCGA-FI-A2CX	2031	82	Tumor	TCGA-UCEC	Stage I	G3			Post		Complete Remission/Response	NO	21.6441	Fe.cluster A	>64	normal	Wildtype	Mutant	Wildtype	Wildtype	Alive	Fe.Gene.cluster C	-9.87856	Low Fe.score
TCGA-AX-A2H5-01A	0	TCGA-AX-A2H5	2167	67	Tumor	TCGA-UCEC	Stage III	G3					Complete Remission/Response	YES	33.5635	Fe.cluster C	>64	>=24	Wildtype	Mutant	Wildtype	Wildtype	Alive	Fe.Gene.cluster C	-0.81261	High Fe.score
TCGA-AX-A1C9-01A	0	TCGA-AX-A1C9	802	73	Tumor	TCGA-UCEC	Stage I	G2			Post			NO	31.5963	Fe.cluster B	>64	>=24	Mutant	Mutant	Mutant	Wildtype	Alive	Fe.Gene.cluster C	-2.22361	High Fe.score
TCGA-DI-A2QT-01A	1	TCGA-DI-A2QT	377	51	Tumor	TCGA-UCEC	Stage III	G3			Post				25.4767	Fe.cluster A	<=64	>=24	Wildtype	Mutant	Wildtype	Wildtype	Dead	Fe.Gene.cluster C	1.42888	High Fe.score
TCGA-AX-A3G8-01A	0	TCGA-AX-A3G8	36	76	Tumor	TCGA-UCEC	Stage I	G3			Post				25.1532	Fe.cluster C	>64	>=24	Mutant	Wildtype	Mutant	Wildtype	Alive	Fe.Gene.cluster C	0.187683	High Fe.score
TCGA-BK-A0CC-01B	0	TCGA-BK-A0CC	1067	69	Tumor	TCGA-UCEC	Stage III	G3	YES	YES	Post	3	Complete Remission/Response	YES	31.1634	Fe.cluster B	>64	>=24					Alive	Fe.Gene.cluster C	-0.14282	High Fe.score
TCGA-AW-A1PO-01A	0	TCGA-AW-A1PO	17	66	Tumor	TCGA-UCEC	Stage III	G3			Post			NO	22.1003	Fe.cluster B	>64	normal	Wildtype	Mutant	Wildtype	Wildtype	Alive	Fe.Gene.cluster C	3.78581	High Fe.score
TCGA-EO-A3AV-01A	0	TCGA-EO-A3AV	1069	51	Tumor	TCGA-UCEC	Stage III	G3	NO	NO	Peri	1	Complete Remission/Response	YES	18.026	Fe.cluster D	<=64	normal	Mutant	Wildtype	Mutant	Mutant	Alive	Fe.Gene.cluster C	-9.50507	Low Fe.score
TCGA-AX-A2HG-01A	0	TCGA-AX-A2HG	1163	56	Tumor	TCGA-UCEC	Stage I	G3			Post			YES	46.655	Fe.cluster C	<=64	>=24	Mutant	Mutant	Wildtype	Mutant	Alive	Fe.Gene.cluster C	-2.19566	High Fe.score
TCGA-KP-A3W4-01A	1	TCGA-KP-A3W4	554	63	Tumor	TCGA-UCEC	Stage III	G3			Post				26.7532	Fe.cluster B	<=64	>=24	Wildtype	Mutant	Wildtype	Wildtype	Dead	Fe.Gene.cluster C	1.30685	High Fe.score
TCGA-A5-A0GQ-01A	0	TCGA-A5-A0GQ	2247	76	Tumor	TCGA-UCEC	Stage I	G1	NO	YES	Post	2	Complete Remission/Response	NO	25.3333	Fe.cluster A	>64	>=24	Mutant	Wildtype	Wildtype	Wildtype	Alive	Fe.Gene.cluster A	-8.25176	Low Fe.score
TCGA-A5-A1OH-01A	0	TCGA-A5-A1OH	1105	86	Tumor	TCGA-UCEC	Stage III	G3	NO	YES	Post	4+	Complete Remission/Response	YES	24.5577	Fe.cluster B	>64	>=24	Wildtype	Wildtype	Wildtype	Wildtype	Alive	Fe.Gene.cluster C	4.04513	High Fe.score
TCGA-D1-A16F-01A	0	TCGA-D1-A16F	80	60	Tumor	TCGA-UCEC	Stage I	G2	YES	NO	Post	3	Complete Remission/Response	NO	36.5126	Fe.cluster A	<=64	>=24	Mutant	Wildtype	Mutant	Wildtype	Alive	Fe.Gene.cluster B	-5.50093	Low Fe.score
TCGA-B5-A11R-01A	0	TCGA-B5-A11R	2349	51	Tumor	TCGA-UCEC	Stage II	G3			Post	2	Complete Remission/Response	YES	31.5334	Fe.cluster D	<=64	>=24	Mutant	Wildtype	Wildtype	Mutant	Alive	Fe.Gene.cluster A	-3.07897	High Fe.score
TCGA-D1-A17F-01A	0	TCGA-D1-A17F	39	68	Tumor	TCGA-UCEC	Stage I	G2	NO	NO	Post	2	Complete Remission/Response	NO	31.6456	Fe.cluster A	>64	>=24	Mutant	Wildtype	Wildtype	Mutant	Alive	Fe.Gene.cluster A	-9.21941	Low Fe.score
TCGA-AX-A2IO-01A	0	TCGA-AX-A2IO	1975	83	Tumor	TCGA-UCEC	Stage II	G3			Post			YES	24.3865	Fe.cluster B	>64	>=24	Wildtype	Mutant	Wildtype	Wildtype	Alive	Fe.Gene.cluster C	1.30177	High Fe.score
TCGA-EC-A1QX-01A	0	TCGA-EC-A1QX	224	71	Tumor	TCGA-UCEC	Stage I	G3			Post				34.7209	Fe.cluster B	>64	>=24	Mutant	Wildtype	Wildtype	Mutant	Alive	Fe.Gene.cluster C	-5.79861	Low Fe.score
TCGA-AP-A054-01A	1	TCGA-AP-A054	709	64	Tumor	TCGA-UCEC	Stage III	G3	NO	YES	Post	2	Complete Remission/Response	NO	26.8923	Fe.cluster B	<=64	>=24	Mutant	Mutant	Wildtype	Wildtype	Dead	Fe.Gene.cluster C	-0.20083	High Fe.score
TCGA-BG-A0M6-01A	1	TCGA-BG-A0M6	671	73	Tumor	TCGA-UCEC	Stage III	G3	NO	YES	Post		Complete Remission/Response	YES	23.8054	Fe.cluster B	>64	normal	Wildtype	Mutant	Wildtype	Wildtype	Dead	Fe.Gene.cluster C	2.89909	High Fe.score
TCGA-2E-A9G8-01A	0	TCGA-2E-A9G8	1249	59	Tumor	TCGA-UCEC	Stage III	G2	NO	NO	Post	2	Progressive Disease	YES	28.8044	Fe.cluster C	<=64	>=24	Wildtype	Mutant	Wildtype	Wildtype	Alive	Fe.Gene.cluster C	0.215509	High Fe.score
TCGA-B5-A5OE-01A	0	TCGA-B5-A5OE	1063	68	Tumor	TCGA-UCEC	Stage III	G3	NO	YES		4+		NO	NA	Fe.cluster C	>64		Wildtype	Wildtype	Wildtype	Mutant	Alive	Fe.Gene.cluster C	2.2715	High Fe.score
TCGA-B5-A0JT-01A	0	TCGA-B5-A0JT	1682	63	Tumor	TCGA-UCEC	Stage III	G1	YES	YES	Post	0	Complete Remission/Response	NO	42.1627	Fe.cluster D	<=64	>=24	Wildtype	Wildtype	Wildtype	Wildtype	Alive	Fe.Gene.cluster B	-5.10227	Low Fe.score
TCGA-AP-A0LP-01A	0	TCGA-AP-A0LP	1875	76	Tumor	TCGA-UCEC	Stage I	G1	NO	NO	Post	3	Complete Remission/Response	YES	21.5139	Fe.cluster A	>64	normal	Mutant	Wildtype	Wildtype	Wildtype	Alive	Fe.Gene.cluster A	-4.0434	Low Fe.score
TCGA-DI-A1BY-01A	0	TCGA-DI-A1BY	1114	63	Tumor	TCGA-UCEC	Stage II	G2	YES	YES		4+	Complete Remission/Response	YES	52.0291	Fe.cluster A	<=64	>=24	Mutant	Wildtype	Wildtype	Wildtype	Alive	Fe.Gene.cluster B	-6.75533	Low Fe.score
TCGA-B5-A1MY-01A	1	TCGA-B5-A1MY	361	62	Tumor	TCGA-UCEC	Stage III	G3		YES	Post	4+		YES	31.4318	Fe.cluster A	<=64	>=24	Wildtype	Wildtype	Wildtype	Wildtype	Dead	Fe.Gene.cluster C	1.33698	High Fe.score
TCGA-EY-A1GQ-01A	0	TCGA-EY-A1GQ	544	76	Tumor	TCGA-UCEC	Stage I	G3	NO	YES	Post	4+	Complete Remission/Response	YES	29.7521	Fe.cluster C	>64	>=24	Mutant	Wildtype	Wildtype	Wildtype	Alive	Fe.Gene.cluster C	-1.81757	High Fe.score
TCGA-BG-A0MU-01A	0	TCGA-BG-A0MU	617	78	Tumor	TCGA-UCEC	Stage III	G1	NO	NO	Post		Complete Remission/Response	YES	29.4321	Fe.cluster A	>64	>=24	Mutant	Wildtype	Wildtype	Wildtype	Alive	Fe.Gene.cluster B	-7.84368	Low Fe.score
TCGA-SJ-A6ZI-01A	0	TCGA-SJ-A6ZI	631	64	Tumor	TCGA-UCEC	Stage I	G1	NO	YES		2	Complete Remission/Response	YES	213.499	Fe.cluster B	<=64	>=24	Mutant	Mutant	Wildtype	Mutant	Alive	Fe.Gene.cluster B	-7.40494	Low Fe.score
TCGA-AX-A0J1-01A	0	TCGA-AX-A0J1	2354	80	Tumor	TCGA-UCEC	Stage I	G2			Post		Complete Remission/Response	NO	22.2656	Fe.cluster B	>64	normal	Mutant	Wildtype	Wildtype	Mutant	Alive	Fe.Gene.cluster C	-4.46035	Low Fe.score
TCGA-BS-A0V8-01A	0	TCGA-BS-A0V8	2544	68	Tumor	TCGA-UCEC	Stage II	G2	YES	YES	Post	4+	Complete Remission/Response	YES	34.4842	Fe.cluster A	>64	>=24	Mutant	Mutant	Wildtype	Wildtype	Alive	Fe.Gene.cluster C	-4.55877	Low Fe.score
TCGA-AP-A0LM-01A	0	TCGA-AP-A0LM	825	33	Tumor	TCGA-UCEC	Stage III	G3	NO	YES	Pre	1	Complete Remission/Response	YES	36.2897	Fe.cluster C	<=64	>=24	Wildtype	Wildtype	Mutant	Mutant	Alive	Fe.Gene.cluster C	-8.36077	Low Fe.score
TCGA-BS-A0TG-01A	0	TCGA-BS-A0TG	2371	60	Tumor	TCGA-UCEC	Stage III	G2	NO	YES	Post	3	Complete Remission/Response	YES	24.0882	Fe.cluster A	<=64	>=24	Wildtype	Wildtype	Mutant	Wildtype	Alive	Fe.Gene.cluster B	-4.91312	Low Fe.score
TCGA-BG-A0MQ-01A	0	TCGA-BG-A0MQ	1817	71	Tumor	TCGA-UCEC	Stage I	G1			Post		Stable Disease	YES	37.0983	Fe.cluster B	>64	>=24	Mutant	Wildtype	Wildtype	Wildtype	Alive	Fe.Gene.cluster C	-1.30536	High Fe.score
TCGA-AP-A0LV-01A	0	TCGA-AP-A0LV	763	39	Tumor	TCGA-UCEC	Stage I	G1			Pre			NO	32.8947	Fe.cluster A	<=64	>=24	Wildtype	Wildtype	Wildtype	Wildtype	Alive	Fe.Gene.cluster B	-5.54015	Low Fe.score
TCGA-EY-A1GO-01A	0	TCGA-EY-A1GO	586	65	Tumor	TCGA-UCEC	Stage III	G2	NO	NO	Post	2	Complete Remission/Response	YES	31.2294	Fe.cluster B	>64	>=24	Wildtype	Wildtype	Mutant	Wildtype	Alive	Fe.Gene.cluster C	1.77302	High Fe.score
TCGA-B5-A0JZ-01A	0	TCGA-B5-A0JZ	2173	60	Tumor	TCGA-UCEC	Stage III	G3	NO	NO	Post	0	Progressive Disease	YES	33.1504	Fe.cluster A	<=64	>=24	Mutant	Wildtype	Wildtype	Wildtype	Alive	Fe.Gene.cluster C	-6.67407	Low Fe.score
TCGA-AX-A060-01A	0	TCGA-AX-A060	1075	77	Tumor	TCGA-UCEC	Stage I	G3		YES	Post	4+	Complete Remission/Response	YES	32.7449	Fe.cluster A	>64	>=24					Alive	Fe.Gene.cluster B	-3.52636	Low Fe.score
TCGA-AX-A2HH-01A	0	TCGA-AX-A2HH	540	60	Tumor	TCGA-UCEC	Stage I	G3		NO			Partial Remission/Response	NO	27.0552	Fe.cluster B	<=64	>=24	Wildtype	Wildtype	Wildtype	Wildtype	Alive	Fe.Gene.cluster C	3.18783	High Fe.score
TCGA-EO-A3AZ-01A	0	TCGA-EO-A3AZ	826	80	Tumor	TCGA-UCEC	Stage I	G3	NO	YES	Post	2	Complete Remission/Response	NO	39.7959	Fe.cluster A	>64	>=24	Wildtype	Mutant	Wildtype	Wildtype	Alive	Fe.Gene.cluster C	-6.1434	Low Fe.score
TCGA-DF-A2KU-01A	0	TCGA-DF-A2KU	3067	NA	Tumor	TCGA-UCEC	Stage I	G3	NO	NO	Post	2	Complete Remission/Response	YES	NA	Fe.cluster C			Mutant	Mutant	Wildtype	Mutant	Alive	Fe.Gene.cluster C	-5.79314	Low Fe.score
TCGA-B5-A0K6-01A	0	TCGA-B5-A0K6	1953	58	Tumor	TCGA-UCEC	Stage I	G1	YES	YES	Post	0	Complete Remission/Response	NO	47.3305	Fe.cluster A	<=64	>=24	Mutant	Wildtype	Mutant	Wildtype	Alive	Fe.Gene.cluster B	-8.87954	Low Fe.score
TCGA-AP-A0LL-01A	0	TCGA-AP-A0LL	2554	56	Tumor	TCGA-UCEC	Stage I	G1			Post			NO	27.7767	Fe.cluster A	<=64	>=24	Wildtype	Wildtype	Wildtype	Wildtype	Alive	Fe.Gene.cluster B	-5.94122	Low Fe.score
TCGA-A5-A2K4-01A	1	TCGA-A5-A2K4	871	69	Tumor	TCGA-UCEC	Stage III	G3	NO	NO	Post	3	Complete Remission/Response	NO	18.0697	Fe.cluster A	>64	normal	Wildtype	Mutant	Wildtype	Wildtype	Dead	Fe.Gene.cluster C	-0.71646	High Fe.score
TCGA-D1-A163-01A	0	TCGA-D1-A163	991	50	Tumor	TCGA-UCEC	Stage III	G2	NO	NO	Peri	1	Complete Remission/Response	YES	38.1639	Fe.cluster A	<=64	>=24	Mutant	Wildtype	Mutant	Wildtype	Alive	Fe.Gene.cluster C	-4.4845	Low Fe.score
TCGA-D1-A17M-01A	0	TCGA-D1-A17M	311	56	Tumor	TCGA-UCEC	Stage II	G1	NO	YES	Post	3	Complete Remission/Response	YES	53.4457	Fe.cluster A	<=64	>=24	Mutant	Wildtype	Wildtype	Mutant	Alive	Fe.Gene.cluster B	-5.74059	Low Fe.score
TCGA-B5-A0K0-01A	0	TCGA-B5-A0K0	1478	48	Tumor	TCGA-UCEC	Stage I	G1	YES	YES	Indeterminate	3	Complete Remission/Response	NO	49.6032	Fe.cluster A	<=64	>=24	Wildtype	Wildtype	Wildtype	Wildtype	Alive	Fe.Gene.cluster B	-8.26965	Low Fe.score
TCGA-BG-A0M9-01A	0	TCGA-BG-A0M9	2270	73	Tumor	TCGA-UCEC	Stage I	G2			Post			NO	36.3281	Fe.cluster B	>64	>=24	Mutant	Wildtype	Mutant	Wildtype	Alive	Fe.Gene.cluster A	-3.40619	Low Fe.score
TCGA-BG-A0MT-01A	0	TCGA-BG-A0MT	644	64	Tumor	TCGA-UCEC	Stage I	G2	NO	NO	Post		Partial Remission/Response	YES	25.8645	Fe.cluster B	<=64	>=24	Mutant	Wildtype	Wildtype	Wildtype	Alive	Fe.Gene.cluster B	-4.28309	Low Fe.score
TCGA-B5-A0K7-01A	0	TCGA-B5-A0K7	1933	64	Tumor	TCGA-UCEC	Stage I	G1			Post	2	Complete Remission/Response	NO	21.6128	Fe.cluster A	<=64	normal	Mutant	Wildtype	Wildtype	Wildtype	Alive	Fe.Gene.cluster B	-9.36567	Low Fe.score
TCGA-A5-A0VO-01A	1	TCGA-A5-A0VO	875	64	Tumor	TCGA-UCEC	Stage I	G2	NO	NO	Post	2	Complete Remission/Response	YES	32.3685	Fe.cluster A	<=64	>=24	Mutant	Wildtype	Mutant	Wildtype	Dead	Fe.Gene.cluster B	-7.09683	Low Fe.score
TCGA-AJ-A3BK-01A	0	TCGA-AJ-A3BK	1031	68	Tumor	TCGA-UCEC	Stage I	G3	NO	YES	Post	2	Complete Remission/Response	YES	34.6268	Fe.cluster A	>64	>=24	Mutant	Wildtype	Wildtype	Wildtype	Alive	Fe.Gene.cluster B	-7.76254	Low Fe.score
TCGA-D1-A102-01A	0	TCGA-D1-A102	135	49	Tumor	TCGA-UCEC	Stage I	G2	YES	YES	Peri	0	Complete Remission/Response	NO	38.5052	Fe.cluster B	<=64	>=24	Mutant	Wildtype	Wildtype	Wildtype	Alive	Fe.Gene.cluster B	-6.9514	Low Fe.score
TCGA-AJ-A8CV-01A	0	TCGA-AJ-A8CV	1068	58	Tumor	TCGA-UCEC	Stage I	G2	NO	NO	Post	1	Complete Remission/Response	YES	35.3386	Fe.cluster D	<=64	>=24	Mutant	Wildtype	Wildtype	Wildtype	Alive	Fe.Gene.cluster A	-7.64573	Low Fe.score
TCGA-FI-A2D4-01A	1	TCGA-FI-A2D4	243	44	Tumor	TCGA-UCEC	Stage III	G3	NO	NO	Pre		Partial Remission/Response	NO	42.1544	Fe.cluster D	<=64	>=24	Mutant	Wildtype	Wildtype	Wildtype	Dead	Fe.Gene.cluster C	-0.44599	High Fe.score
TCGA-AP-A0LO-01A	1	TCGA-AP-A0LO	1016	45	Tumor	TCGA-UCEC	Stage I	G2	YES	NO	Pre	3	Complete Remission/Response	NO	26.1719	Fe.cluster C	<=64	>=24	Mutant	Wildtype	Wildtype	Wildtype	Dead	Fe.Gene.cluster B	-3.34798	Low Fe.score
TCGA-A5-A0GR-01A	0	TCGA-A5-A0GR	1120	69	Tumor	TCGA-UCEC	Stage I	G2	YES	YES	Post	1	Complete Remission/Response	NO	28.089	Fe.cluster A	>64	>=24					Alive	Fe.Gene.cluster C	-7.36521	Low Fe.score
TCGA-AX-A0IS-01A	1	TCGA-AX-A0IS	1858	52	Tumor	TCGA-UCEC	Stage I	G2			Post			NO	46.7687	Fe.cluster B	<=64	>=24	Mutant	Wildtype	Wildtype	Wildtype	Dead	Fe.Gene.cluster B	-4.74005	Low Fe.score
TCGA-E6-A2P9-01A	0	TCGA-E6-A2P9	1386	65	Tumor	TCGA-UCEC	Stage I	G3	NO	NO	Post	4+	Complete Remission/Response	YES	41.7655	Fe.cluster B	>64	>=24	Mutant	Wildtype	Wildtype	Wildtype	Alive	Fe.Gene.cluster A	-4.54893	Low Fe.score
TCGA-BS-A0TJ-01A	0	TCGA-BS-A0TJ	2068	59	Tumor	TCGA-UCEC	Stage I	G3	NO	YES	Post	3	Complete Remission/Response	YES	38.0886	Fe.cluster C	<=64	>=24	Mutant	Wildtype	Mutant	Wildtype	Alive	Fe.Gene.cluster C	-3.48065	Low Fe.score
TCGA-AJ-A2QK-01A	0	TCGA-AJ-A2QK	643	65	Tumor	TCGA-UCEC	Stage I	G3	YES	YES	Post		Complete Remission/Response	YES	49.5317	Fe.cluster C	>64	>=24	Mutant	Mutant	Wildtype	Wildtype	Alive	Fe.Gene.cluster C	-4.28305	Low Fe.score
TCGA-AP-A0LS-01A	0	TCGA-AP-A0LS	2904	63	Tumor	TCGA-UCEC	Stage I	G2			Post			YES	28.3604	Fe.cluster A	<=64	>=24	Mutant	Mutant	Mutant	Wildtype	Alive	Fe.Gene.cluster C	-3.23162	High Fe.score
TCGA-BK-A139-02A	1	TCGA-BK-A139	943	74	Tumor	TCGA-UCEC	Stage I	G3	NO	YES	Post	2		NO	24.8777	Fe.cluster C	>64	>=24					Dead	Fe.Gene.cluster C	4.0773	High Fe.score
TCGA-AP-A0LE-01A	0	TCGA-AP-A0LE	3357	57	Tumor	TCGA-UCEC	Stage I	G3			Post			NO	29.2969	Fe.cluster C	<=64	>=24	Mutant	Wildtype	Mutant	Wildtype	Alive	Fe.Gene.cluster C	-3.52241	Low Fe.score
TCGA-AX-A2HJ-01A	0	TCGA-AX-A2HJ	935	35	Tumor	TCGA-UCEC	Stage I	G3		YES		0	Complete Remission/Response	YES	24.2382	Fe.cluster B	<=64	>=24	Mutant	Mutant	Mutant	Mutant	Alive	Fe.Gene.cluster B	-1.81241	High Fe.score
TCGA-AJ-A3EM-01A	0	TCGA-AJ-A3EM	677	69	Tumor	TCGA-UCEC	Stage I	G3	NO	NO	Post	4+	Complete Remission/Response	NO	30.1194	Fe.cluster C	>64	>=24	Mutant	Wildtype	Wildtype	Wildtype	Alive	Fe.Gene.cluster C	5.78397	High Fe.score
TCGA-EO-A22T-01A	0	TCGA-EO-A22T	2035	56	Tumor	TCGA-UCEC	Stage II	G3	NO	NO	Post	2	Complete Remission/Response	YES	22.9398	Fe.cluster D	<=64	normal	Mutant	Wildtype	Wildtype	Wildtype	Alive	Fe.Gene.cluster C	-4.20641	Low Fe.score
TCGA-A5-A0RA-01A	0	TCGA-A5-A0RA	884	68	Tumor	TCGA-UCEC	Stage I	G2	NO	YES	Post	1	Complete Remission/Response	YES	47.0343	Fe.cluster B	>64	>=24	Mutant	Wildtype	Wildtype	Wildtype	Alive	Fe.Gene.cluster A	-3.53316	Low Fe.score
TCGA-AJ-A3EL-01A	0	TCGA-AJ-A3EL	684	47	Tumor	TCGA-UCEC	Stage I	G3		NO	Pre	0	Complete Remission/Response	NO	23.7253	Fe.cluster C	<=64	normal	Mutant	Wildtype	Wildtype	Mutant	Alive	Fe.Gene.cluster C	-5.95165	Low Fe.score
TCGA-D1-A16O-01A	0	TCGA-D1-A16O	1023	44	Tumor	TCGA-UCEC	Stage I	G1	NO	YES	Post	2	Complete Remission/Response	NO	35.713	Fe.cluster B	<=64	>=24	Wildtype	Wildtype	Mutant	Wildtype	Alive	Fe.Gene.cluster A	-4.10994	Low Fe.score
TCGA-A5-A0GB-01A	0	TCGA-A5-A0GB	997	65	Tumor	TCGA-UCEC	Stage I	G3	NO	NO	Post	4+	Complete Remission/Response	YES	44.8118	Fe.cluster B	>64	>=24	Mutant	Wildtype	Mutant	Mutant	Alive	Fe.Gene.cluster C	-3.16037	High Fe.score
TCGA-D1-A16Q-01A	0	TCGA-D1-A16Q	324	54	Tumor	TCGA-UCEC	Stage II	G2	YES	YES	Post	0	Complete Remission/Response	YES	39.5484	Fe.cluster A	<=64	>=24	Wildtype	Wildtype	Wildtype	Wildtype	Alive	Fe.Gene.cluster B	-8.33884	Low Fe.score
TCGA-BG-A222-01A	0	TCGA-BG-A222	291	49	Tumor	TCGA-UCEC	Stage I	G3	NO	NO		1	Complete Remission/Response	YES	47.3305	Fe.cluster A	<=64	>=24	Mutant	Wildtype	Wildtype	Wildtype	Alive	Fe.Gene.cluster C	0.300943	High Fe.score
TCGA-PG-A916-01A	0	TCGA-PG-A916	522	70	Tumor	TCGA-UCEC	Stage I	G2	NO	YES	Post	1	Complete Remission/Response	NO	NA	Fe.cluster B	>64		Mutant	Wildtype	Wildtype	Wildtype	Alive	Fe.Gene.cluster A	-4.48571	Low Fe.score
TCGA-AX-A1C5-01A	0	TCGA-AX-A1C5	1001	47	Tumor	TCGA-UCEC	Stage III	G3			Indeterminate		Complete Remission/Response	YES	41.7969	Fe.cluster B	<=64	>=24	Mutant	Wildtype	Mutant	Wildtype	Alive	Fe.Gene.cluster C	-1.64007	High Fe.score
TCGA-PG-A915-01A	0	TCGA-PG-A915	249	60	Tumor	TCGA-UCEC	Stage I	G3	NO	NO	Post	2	Complete Remission/Response	NO	NA	Fe.cluster B	<=64		Wildtype	Mutant	Wildtype	Wildtype	Alive	Fe.Gene.cluster C	3.63971	High Fe.score
TCGA-AX-A2HD-01A	0	TCGA-AX-A2HD	1414	69	Tumor	TCGA-UCEC	Stage III	G3				4+	Partial Remission/Response	NO	22.9719	Fe.cluster B	>64	normal	Mutant	Mutant	Wildtype	Wildtype	Alive	Fe.Gene.cluster C	-3.9963	Low Fe.score
TCGA-BG-A18B-01A	0	TCGA-BG-A18B	470	53	Tumor	TCGA-UCEC	Stage I	G2	NO	NO	Peri	1	Complete Remission/Response	NO	43.6599	Fe.cluster A	<=64	>=24	Mutant	Wildtype	Mutant	Wildtype	Alive	Fe.Gene.cluster A	-6.8174	Low Fe.score
TCGA-AP-A1E1-01A	0	TCGA-AP-A1E1	1395	74	Tumor	TCGA-UCEC	Stage I	G2			Post			NO	28.5156	Fe.cluster B	>64	>=24	Mutant	Wildtype	Wildtype	Wildtype	Alive	Fe.Gene.cluster B	-5.06706	Low Fe.score
TCGA-A5-A3LP-01A	0	TCGA-A5-A3LP	455	74	Tumor	TCGA-UCEC	Stage I	G3	NO	YES	Post	2	Complete Remission/Response	NO	18.1955	Fe.cluster D	>64	normal	Wildtype	Mutant	Wildtype	Wildtype	Alive	Fe.Gene.cluster C	3.93802	High Fe.score
TCGA-AP-A1DV-01A	0	TCGA-AP-A1DV	204	59	Tumor	TCGA-UCEC	Stage II	G3	NO	YES	Post	0	Complete Remission/Response	YES	21.2874	Fe.cluster C	<=64	normal	Mutant	Mutant	Mutant	Mutant	Alive	Fe.Gene.cluster C	-4.07873	Low Fe.score
TCGA-BS-A0TI-01A	0	TCGA-BS-A0TI	1882	64	Tumor	TCGA-UCEC	Stage I	G3	NO	NO	Post	0	Complete Remission/Response	NO	22.2063	Fe.cluster A	<=64	normal	Mutant	Mutant	Wildtype	Wildtype	Alive	Fe.Gene.cluster C	-4.47862	Low Fe.score
TCGA-AX-A2H2-01A	1	TCGA-AX-A2H2	145	86	Tumor	TCGA-UCEC	Stage II	G3	YES	YES	Post	4+	Complete Remission/Response	NO	24.7676	Fe.cluster C	>64	>=24	Wildtype	Mutant	Wildtype	Wildtype	Dead	Fe.Gene.cluster C	0.776612	High Fe.score
TCGA-AX-A05S-01A	1	TCGA-AX-A05S	413	81	Tumor	TCGA-UCEC	Stage III	G3	NO	NO	Post	3	Progressive Disease	YES	20.7756	Fe.cluster A	>64	normal	Wildtype	Wildtype	Wildtype	Wildtype	Dead	Fe.Gene.cluster B	-3.55913	Low Fe.score
TCGA-D1-A162-01A	0	TCGA-D1-A162	1145	69	Tumor	TCGA-UCEC	Stage I	G1	NO	NO	Post	3	Complete Remission/Response	NO	34.6021	Fe.cluster B	>64	>=24					Alive	Fe.Gene.cluster B	-3.55996	Low Fe.score
TCGA-D1-A0ZS-01A	0	TCGA-D1-A0ZS	148	54	Tumor	TCGA-UCEC	Stage I	G3	NO	NO	Post	2	Complete Remission/Response	YES	23.0517	Fe.cluster C	<=64	normal	Mutant	Wildtype	Mutant	Wildtype	Alive	Fe.Gene.cluster C	0.703929	High Fe.score
TCGA-BS-A0V6-01A	0	TCGA-BS-A0V6	2725	55	Tumor	TCGA-UCEC	Stage I	G1	NO	NO	Post	1	Complete Remission/Response	NO	33.6728	Fe.cluster B	<=64	>=24	Wildtype	Wildtype	Wildtype	Wildtype	Alive	Fe.Gene.cluster A	-7.48649	Low Fe.score
TCGA-KP-A3W1-01A	0	TCGA-KP-A3W1	288	76	Tumor	TCGA-UCEC	Stage I	G3			Post				22.8374	Fe.cluster C	>64	normal	Wildtype	Mutant	Wildtype	Wildtype	Alive	Fe.Gene.cluster C	-4.60023	Low Fe.score
TCGA-D1-A0ZU-01A	0	TCGA-D1-A0ZU	872	34	Tumor	TCGA-UCEC	Stage I	G2	NO	NO	Pre	0	Complete Remission/Response	YES	32.526	Fe.cluster A	<=64	>=24	Mutant	Wildtype	Wildtype	Wildtype	Alive	Fe.Gene.cluster B	-4.36353	Low Fe.score
TCGA-D1-A3DA-01A	0	TCGA-D1-A3DA	483	77	Tumor	TCGA-UCEC	Stage III	G3	NO	NO	Post	2	Complete Remission/Response	NO	24.6711	Fe.cluster B	>64	>=24	Wildtype	Wildtype	Mutant	Wildtype	Alive	Fe.Gene.cluster C	-0.30929	High Fe.score
TCGA-AP-A05H-01A	0	TCGA-AP-A05H	1385	75	Tumor	TCGA-UCEC	Stage I	G3			Post			NO	38.0196	Fe.cluster C	>64	>=24	Wildtype	Mutant	Wildtype	Wildtype	Alive	Fe.Gene.cluster C	0.223853	High Fe.score
TCGA-D1-A16N-01A	0	TCGA-D1-A16N	945	51	Tumor	TCGA-UCEC	Stage III	G3	YES	YES	Peri	2	Complete Remission/Response	YES	37.0448	Fe.cluster A	<=64	>=24	Mutant	Mutant	Wildtype	Mutant	Alive	Fe.Gene.cluster C	0.358763	High Fe.score
TCGA-AP-A05D-01A	0	TCGA-AP-A05D	1758	67	Tumor	TCGA-UCEC	Stage III	G3			Post			NO	37.8072	Fe.cluster A	>64	>=24	Wildtype	Mutant	Wildtype	Wildtype	Alive	Fe.Gene.cluster C	1.25591	High Fe.score
TCGA-BG-A2AE-01A	0	TCGA-BG-A2AE	721	57	Tumor	TCGA-UCEC	Stage I	G3			Peri		Complete Remission/Response	YES	42.1335	Fe.cluster A	<=64	>=24	Wildtype	Wildtype	Mutant	Wildtype	Alive	Fe.Gene.cluster C	-4.04125	Low Fe.score
TCGA-AX-A1CJ-01A	0	TCGA-AX-A1CJ	2233	59	Tumor	TCGA-UCEC	Stage I	G2			Indeterminate			YES	43.2835	Fe.cluster A	<=64	>=24	Mutant	Wildtype	Wildtype	Wildtype	Alive	Fe.Gene.cluster A	-6.8647	Low Fe.score
TCGA-AP-A5FX-01A	1	TCGA-AP-A5FX	1099	68	Tumor	TCGA-UCEC	Stage III	G3			Post		Complete Remission/Response	YES	28.3447	Fe.cluster C	>64	>=24	Wildtype	Wildtype	Wildtype	Wildtype	Dead	Fe.Gene.cluster A	-1.55818	High Fe.score
TCGA-EY-A210-01A	0	TCGA-EY-A210	383	82	Tumor	TCGA-UCEC	Stage III	G3	NO	NO	Post	4+	Complete Remission/Response	NO	26.2227	Fe.cluster A	>64	>=24	Wildtype	Wildtype	Wildtype	Wildtype	Alive	Fe.Gene.cluster C	1.85606	High Fe.score
TCGA-D1-A169-01A	0	TCGA-D1-A169	1135	63	Tumor	TCGA-UCEC	Stage IV	G2	NO	NO	Post	0	Complete Remission/Response	NO	35.2941	Fe.cluster A	<=64	>=24	Mutant	Mutant	Wildtype	Wildtype	Alive	Fe.Gene.cluster B	-7.55805	Low Fe.score
TCGA-PG-A914-01A	0	TCGA-PG-A914	687	73	Tumor	TCGA-UCEC	Stage I	G3			Post		Complete Remission/Response	YES	NA	Fe.cluster C	>64		Wildtype	Mutant	Wildtype	Wildtype	Alive	Fe.Gene.cluster C	0.66969	High Fe.score
TCGA-BG-A0M2-01A	0	TCGA-BG-A0M2	637	62	Tumor	TCGA-UCEC	Stage I	G2	NO	NO	Post		Complete Remission/Response	YES	26.9274	Fe.cluster B	<=64	>=24	Mutant	Wildtype	Wildtype	Wildtype	Alive	Fe.Gene.cluster B	-6.07762	Low Fe.score
TCGA-D1-A1NW-01A	0	TCGA-D1-A1NW	22	72	Tumor	TCGA-UCEC	Stage IV	G3	NO	NO	Post	4+	Complete Remission/Response	NO	38.2812	Fe.cluster C	>64	>=24	Wildtype	Mutant	Wildtype	Wildtype	Alive	Fe.Gene.cluster C	-0.70772	High Fe.score
TCGA-AJ-A8CW-01A	0	TCGA-AJ-A8CW	4	64	Tumor	TCGA-UCEC	Stage I	G2			Post				47.4773	Fe.cluster B	<=64	>=24	Wildtype	Wildtype	Wildtype	Wildtype	Alive	Fe.Gene.cluster B	-5.31048	Low Fe.score
TCGA-EY-A1GC-01A	0	TCGA-EY-A1GC	1647	62	Tumor	TCGA-UCEC	Stage I	G3			Post		Complete Remission/Response	NO	34.4222	Fe.cluster D	<=64	>=24	Wildtype	Mutant	Wildtype	Wildtype	Alive	Fe.Gene.cluster C	-2.24586	High Fe.score
TCGA-A5-A0GV-01A	0	TCGA-A5-A0GV	1643	67	Tumor	TCGA-UCEC	Stage I	G1	NO	YES	Post	4+	Complete Remission/Response	NO	25.2363	Fe.cluster A	>64	>=24	Mutant	Wildtype	Wildtype	Wildtype	Alive	Fe.Gene.cluster B	-0.45924	High Fe.score
TCGA-BS-A0UM-01A	0	TCGA-BS-A0UM	2644	64	Tumor	TCGA-UCEC	Stage I	G1	NO	YES	Post	2	Complete Remission/Response	NO	35.1562	Fe.cluster B	<=64	>=24	Mutant	Wildtype	Wildtype	Wildtype	Alive	Fe.Gene.cluster B	-9.43617	Low Fe.score
TCGA-B5-A5OD-01A	0	TCGA-B5-A5OD	1038	67	Tumor	TCGA-UCEC	Stage III	G3	NO	NO		0		YES	NA	Fe.cluster A	>64		Wildtype	Mutant	Wildtype	Wildtype	Alive	Fe.Gene.cluster C	0.158637	High Fe.score
TCGA-A5-A0GM-01A	0	TCGA-A5-A0GM	1841	53	Tumor	TCGA-UCEC	Stage I	G1	NO	NO	Post	2	Complete Remission/Response	NO	37.8906	Fe.cluster C	<=64	>=24	Mutant	Wildtype	Wildtype	Wildtype	Alive	Fe.Gene.cluster B	-2.20997	High Fe.score
TCGA-FI-A2CY-01A	0	TCGA-FI-A2CY	2080	60	Tumor	TCGA-UCEC	Stage I	G3			Post		Complete Remission/Response	NO	47.5624	Fe.cluster A	<=64	>=24	Wildtype	Mutant	Wildtype	Wildtype	Alive	Fe.Gene.cluster C	-1.47786	High Fe.score
TCGA-EY-A1GR-01A	0	TCGA-EY-A1GR	536	67	Tumor	TCGA-UCEC	Stage I	G3	YES	YES	Post	3	Complete Remission/Response	NO	34.1598	Fe.cluster A	>64	>=24	Wildtype	Mutant	Wildtype	Wildtype	Alive	Fe.Gene.cluster C	-0.20465	High Fe.score
TCGA-B5-A0JR-01A	0	TCGA-B5-A0JR	1731	73	Tumor	TCGA-UCEC	Stage I	G3	NO	YES	Post	2	Complete Remission/Response	NO	40.5077	Fe.cluster B	>64	>=24	Wildtype	Wildtype	Wildtype	Wildtype	Alive	Fe.Gene.cluster C	-3.9012	Low Fe.score
TCGA-5S-A9Q8-01A	0	TCGA-5S-A9Q8	313	51	Tumor	TCGA-UCEC	Stage III	G2	YES	NO		0	Complete Remission/Response	YES	32.7694	Fe.cluster A	<=64	>=24	Mutant	Wildtype	Wildtype	Wildtype	Alive	Fe.Gene.cluster B	-6.1961	Low Fe.score
TCGA-AP-A1DQ-01A	1	TCGA-AP-A1DQ	1423	76	Tumor	TCGA-UCEC	Stage III	High Grade	NO	NO	Post	0	Complete Remission/Response	NO	22.5827	Fe.cluster B	>64	normal	Wildtype	Mutant	Wildtype	Wildtype	Dead	Fe.Gene.cluster C	2.16641	High Fe.score
TCGA-AX-A05U-01A	0	TCGA-AX-A05U	903	56	Tumor	TCGA-UCEC	Stage I	G1	YES	YES	Post	4+	Complete Remission/Response	NO	25.8065	Fe.cluster B	<=64	>=24	Mutant	Wildtype	Wildtype	Wildtype	Alive	Fe.Gene.cluster B	-1.8367	High Fe.score
TCGA-BS-A0UL-01A	0	TCGA-BS-A0UL	2481	54	Tumor	TCGA-UCEC	Stage I	G1	YES	YES	Peri	2	Complete Remission/Response	NO	39.4464	Fe.cluster C	<=64	>=24	Wildtype	Wildtype	Mutant	Wildtype	Alive	Fe.Gene.cluster C	-7.52937	Low Fe.score
TCGA-D1-A16E-01A	0	TCGA-D1-A16E	1119	73	Tumor	TCGA-UCEC	Stage I	G1	NO	YES	Post	2	Complete Remission/Response	NO	25.2994	Fe.cluster A	>64	>=24	Mutant	Wildtype	Wildtype	Wildtype	Alive	Fe.Gene.cluster A	-7.19889	Low Fe.score
TCGA-AX-A0IZ-01A	0	TCGA-AX-A0IZ	1333	53	Tumor	TCGA-UCEC	Stage I	G3			Post				23.4375	Fe.cluster C	<=64	normal					Alive	Fe.Gene.cluster C	-6.28905	Low Fe.score
TCGA-DI-A1NN-01A	0	TCGA-DI-A1NN	1076	63	Tumor	TCGA-UCEC	Stage III	G3	NO		Post	2	Complete Remission/Response	NO	23.7228	Fe.cluster A	<=64	normal	Wildtype	Mutant	Wildtype	Wildtype	Alive	Fe.Gene.cluster C	-1.11628	High Fe.score
TCGA-AJ-A23O-01A	1	TCGA-AJ-A23O	312	69	Tumor	TCGA-UCEC	Stage I	G3	NO		Post			NO	24.3418	Fe.cluster B	>64	>=24	Mutant	Wildtype	Wildtype	Wildtype	Dead	Fe.Gene.cluster C	-6.57034	Low Fe.score
TCGA-AP-A0L8-01A	1	TCGA-AP-A0L8	1484	70	Tumor	TCGA-UCEC	Stage III	G3	NO	YES	Post	4+	Complete Remission/Response	YES	NA	Fe.cluster C	>64		Wildtype	Mutant	Wildtype	Wildtype	Dead	Fe.Gene.cluster C	3.17144	High Fe.score
TCGA-BK-A26L-01C	0	TCGA-BK-A26L	734	71	Tumor	TCGA-UCEC	Stage III	G3	NO	YES	Post	3	Complete Remission/Response	YES	32.4619	Fe.cluster B	>64	>=24					Alive	Fe.Gene.cluster C	3.98656	High Fe.score
TCGA-BS-A0T9-01A	1	TCGA-BS-A0T9	1428	39	Tumor	TCGA-UCEC	Stage IV	G3	NO	YES	Pre	0	Complete Remission/Response	NO	40.0367	Fe.cluster C	<=64	>=24	Mutant	Wildtype	Wildtype	Wildtype	Dead	Fe.Gene.cluster B	-7.10068	Low Fe.score
TCGA-A5-A1OJ-01A	0	TCGA-A5-A1OJ	1006	31	Tumor	TCGA-UCEC	Stage I	G2	NO	NO	Pre	0	Complete Remission/Response	NO	39.1259	Fe.cluster A	<=64	>=24	Mutant	Wildtype	Wildtype	Wildtype	Alive	Fe.Gene.cluster B	-6.95356	Low Fe.score
TCGA-BK-A13C-01A	0	TCGA-BK-A13C	760	47	Tumor	TCGA-UCEC	Stage I	G2	NO	YES	Peri	0	Complete Remission/Response	NO	33.7495	Fe.cluster B	<=64	>=24	Mutant	Wildtype	Wildtype	Wildtype	Alive	Fe.Gene.cluster A	-2.53971	High Fe.score
TCGA-EO-A3KX-01A	0	TCGA-EO-A3KX	1170	80	Tumor	TCGA-UCEC	Stage I	G3	YES	YES	Post		Complete Remission/Response	YES	20.9275	Fe.cluster C	>64	normal	Mutant	Wildtype	Wildtype	Mutant	Alive	Fe.Gene.cluster C	-0.59096	High Fe.score
TCGA-D1-A15Z-01A	1	TCGA-D1-A15Z	58	72	Tumor	TCGA-UCEC	Stage I	G2	YES	YES	Post	4+	Complete Remission/Response	NO	48.8281	Fe.cluster A	>64	>=24	Mutant	Wildtype	Wildtype	Wildtype	Dead	Fe.Gene.cluster B	-3.18361	High Fe.score
TCGA-D1-A16D-01A	0	TCGA-D1-A16D	1141	49	Tumor	TCGA-UCEC	Stage I	G2	YES	YES	Peri	0	Complete Remission/Response	YES	56.1422	Fe.cluster B	<=64	>=24	Mutant	Wildtype	Mutant	Wildtype	Alive	Fe.Gene.cluster A	-5.98111	Low Fe.score
TCGA-EO-A1Y5-01A	0	TCGA-EO-A1Y5	332	63	Tumor	TCGA-UCEC	Stage III	G3	NO	NO	Post	4+	Complete Remission/Response	YES	30.4772	Fe.cluster C	<=64	>=24	Wildtype	Mutant	Wildtype	Wildtype	Alive	Fe.Gene.cluster C	1.24854	High Fe.score
TCGA-AJ-A23N-01A	1	TCGA-AJ-A23N	439	70	Tumor	TCGA-UCEC	Stage III	G3	NO	YES	Post	2	Progressive Disease	YES	NA	Fe.cluster C	>64		Wildtype	Mutant	Wildtype	Wildtype	Dead	Fe.Gene.cluster C	3.1462	High Fe.score
TCGA-AJ-A3EJ-01A	1	TCGA-AJ-A3EJ	50	74	Tumor	TCGA-UCEC	Stage III	G3	NO	NO	Post	4+		NO	25.8645	Fe.cluster A	>64	>=24	Wildtype	Mutant	Wildtype	Wildtype	Dead	Fe.Gene.cluster C	1.04855	High Fe.score
TCGA-EY-A1GL-01A	0	TCGA-EY-A1GL	1014	51	Tumor	TCGA-UCEC	Stage II	G2			Post		Complete Remission/Response	YES	24.3911	Fe.cluster A	<=64	>=24	Wildtype	Wildtype	Wildtype	Wildtype	Alive	Fe.Gene.cluster B	-2.65733	High Fe.score
TCGA-B5-A3F9-01A	0	TCGA-B5-A3F9	4155	56	Tumor	TCGA-UCEC	Stage I	G3	YES	YES	Post			NO	56.2491	Fe.cluster B	<=64	>=24	Mutant	Mutant	Mutant	Wildtype	Alive	Fe.Gene.cluster B	-6.29188	Low Fe.score
TCGA-D1-A16R-01A	0	TCGA-D1-A16R	21	39	Tumor	TCGA-UCEC	Stage I	G1	NO	NO	Indeterminate	1	Complete Remission/Response	NO	41.5332	Fe.cluster A	<=64	>=24	Mutant	Wildtype	Wildtype	Wildtype	Alive	Fe.Gene.cluster B	-6.91785	Low Fe.score
TCGA-B5-A11Z-01A	0	TCGA-B5-A11Z	528	61	Tumor	TCGA-UCEC	Stage I	G1	NO	NO	Post	3	Complete Remission/Response	NO	28.3937	Fe.cluster B	<=64	>=24	Mutant	Wildtype	Wildtype	Wildtype	Alive	Fe.Gene.cluster B	-5.92305	Low Fe.score
TCGA-AP-A05O-01A	0	TCGA-AP-A05O	384	68	Tumor	TCGA-UCEC	Stage I	G3			Post			YES	41.2594	Fe.cluster A	>64	>=24					Alive	Fe.Gene.cluster A	-6.59384	Low Fe.score
TCGA-D1-A1NZ-01A	0	TCGA-D1-A1NZ	548	60	Tumor	TCGA-UCEC	Stage I	G1	NO	NO	Post	2	Complete Remission/Response	NO	35.5999	Fe.cluster B	<=64	>=24	Mutant	Wildtype	Wildtype	Wildtype	Alive	Fe.Gene.cluster A	-6.28682	Low Fe.score
TCGA-EY-A1GV-01A	0	TCGA-EY-A1GV	481	75	Tumor	TCGA-UCEC	Stage III	G3	YES	YES	Post	4+	Complete Remission/Response	YES	29.0175	Fe.cluster C	>64	>=24	Wildtype	Wildtype	Wildtype	Wildtype	Alive	Fe.Gene.cluster C	-3.15969	High Fe.score
TCGA-D1-A103-01A	0	TCGA-D1-A103	669	87	Tumor	TCGA-UCEC	Stage I	G1	NO	YES	Post	3	Complete Remission/Response	NO	26.6667	Fe.cluster B	>64	>=24	Mutant	Wildtype	Wildtype	Mutant	Alive	Fe.Gene.cluster B	-5.1497	Low Fe.score
TCGA-EO-A3KU-01A	0	TCGA-EO-A3KU	677	68	Tumor	TCGA-UCEC	Stage II	G3	NO	YES	Post	3	Complete Remission/Response	YES	24.4646	Fe.cluster A	>64	>=24	Wildtype	Mutant	Wildtype	Wildtype	Alive	Fe.Gene.cluster C	3.24985	High Fe.score
TCGA-B5-A0K2-01A	0	TCGA-B5-A0K2	2209	54	Tumor	TCGA-UCEC	Stage III	G1	NO	NO	Indeterminate	2	Complete Remission/Response	NO	33.2265	Fe.cluster A	<=64	>=24	Mutant	Wildtype	Wildtype	Wildtype	Alive	Fe.Gene.cluster A	-8.20327	Low Fe.score
TCGA-AJ-A2QN-01A	0	TCGA-AJ-A2QN	1069	60	Tumor	TCGA-UCEC	Stage II	G3	YES	YES	Post	1	Complete Remission/Response	NO	45.6747	Fe.cluster B	<=64	>=24	Mutant	Wildtype	Wildtype	Wildtype	Alive	Fe.Gene.cluster B	-3.02453	High Fe.score
TCGA-D1-A160-01A	0	TCGA-D1-A160	112	70	Tumor	TCGA-UCEC	Stage I	G2	YES	YES	Post	4+	Complete Remission/Response	NO	41.2385	Fe.cluster B	>64	>=24	Mutant	Wildtype	Mutant	Mutant	Alive	Fe.Gene.cluster C	-5.69212	Low Fe.score
